# Supplementary material
Source: publisher figshare collection journal article supplement (https://acs.figshare.com/ndownloader/files/4528618)

## SUPPORTING INFORMATION FOR

**Triphenylphosphine Reduction of Saturated Endoperoxides**

Ihsan Erden,\* Christian Gärtner, M. Saeed Azimi

*San Francisco State University, Department of Chemistry and Biochemistry, 1600 Holloway Avenue, San Francisco, CA 94132, USA,*  
[ierden@sfsu.edu](mailto:ierden@sfsu.edu)

**General.** Melting points were determined in open class capillary tubes and are uncorrected. The  $^1\text{H}$  and  $^{13}\text{C}$  NMR spectra were recorded on a 300 MHz and a 500 MHz NMR spectrometer, using  $\text{CDCl}_3$  as solvent and TMS as internal standard, unless specified otherwise. IR spectra were obtained on a DTGS FT-IR spectrometer. Column chromatographic separations were carried out with Davison 6-200 Mesh silica gel. For preparative TLC, Merck silica gel (grade 60  $\text{PF}_{254}$ ) was used. All reactions, except for the photooxygenations, were conducted under an atmosphere of dry nitrogen or argon. Non-deuterated solvents were dried and distilled prior to use. Exact masses of all new products by high resolution mass spectra (HRMS) were determined at the University of Notre Dame Mass Spectrometry Facility (<http://www.nd.edu/~massspec/>).

**PPh<sub>3</sub> Reduction of 6.** The synthesis of the saturated endoperoxide **6** was accomplished as described by Adam and Erden (ref. 13). The data for the 300 MHz  $^1\text{H}$  NMR spectrum of **6** are listed below:

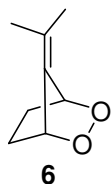

$^1\text{H}$  NMR (300 MHz,  $\text{CDCl}_3$ )  $\delta$  4.85 (t,  $J$  = 1.2 Hz, 2H), 2.0 (m, 2H), 1.80 (s, 6H), 1.68 (m, 2H) ppm.

To a solution of 0.7 g (5 mmol) of endoperoxide **6** in 100 mL  $\text{CH}_2\text{Cl}_2$  was added at 0 °C 1.56 g (6 mmol) of triphenylphosphine, and the mixture was stirred first at 0 °C for two hours and then overnight at room temperature. The solvent was rotovapped and the product mixture separated by flash chromatography on silica gel, eluting with pet.ether/ether 3:1. The top fraction (100 mg, 16% yield) was isolated as a colorless liquid and proved to be the allenic aldehyde **8** whose  $^1\text{H}$  NMR spectrum was identical to the one reported by Crandall and Mualla. Since it proved to be sensitive to silica gel and heat, it was immediately converted to its oxime (vide infra). The second fraction was isolated as a colorless liquid (397 mg, 64%).

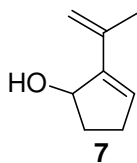

**2-Isopropenylcyclopent-2-enol (7):** Though compound **7** was reported previously the spectral data reported for this compound do not match ours, presumably due to the fact that they were obtained on a lower resolution spectrometer.  $^1\text{H}$  NMR (500 MHz,  $\text{CDCl}_3$ )  $\delta$

5.93 (t,  $J = 2.65$  Hz, 1H), 5.2 (s, 1H), 5.04 (m, 1H), 5.02 (s, 1H), 2.62 (m, 1H), 2.35 (m, 1H), 2.26 (m, 1H), 1.90 (m, 1H), 1.94 (s, 3H), 1.7 (br. 1H, OH);  $^{13}\text{C}$  NMR (128.5 Hz,  $\text{CDCl}_3$ )  $\delta$  146.7, 138.7, 131.9, 113.6, 76.9, 34.4, 31.2, 21.7 ppm; FT-IR (thin film)  $\nu$  3341, 3043, 3096, 2967, 2921, 2840, 1631, 1456, 1439, 1374, 1299, 1147, 1042, 978, 931, 884, 832  $\text{cm}^{-1}$ ; HRMS was unsuccessful, the base peak was at 107 (M-17). MS (ei) 124 ( $\text{M}^+$ ), 107 (100%), 95, 81, 67, 53.

**Derivatization of aldehyde 8 as its oxime 8a.** To a stirred solution of 100 mg (0.8 mmol) of aldehyde **8**, 4 mL of ethanol under nitrogen were added anhydrous sodium acetate (189 mg, 2.30 mmol) followed by hydroxylamine hydrochloride (556 mg, 0.8 mmol). The mixture was stirred at room temperature for 30 min, then 20 mL of water was added, the mixture extracted with 25 mL of diethyl ether, the organic extract washed with 5 mL of sat. aqueous  $\text{NaHCO}_3$ , dried over  $\text{MgSO}_4$  and the solvent rotovapped to give a mixture of a 1.1:1 mixture of the *syn* and *anti* oximes, respectively (106 mg, 96% yield). For an analytical sample, the mixture was purified by preparative TLC, eluting with 40% PE/ 60% EtOAc.

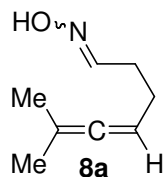

**Syn- and anti-6-Methylhepta-4,5-dienal oximes (8a).**  $^1\text{H}$  NMR (500 MHz,  $\text{CDCl}_3$ ):  $\delta$  7.6-8 (br., 1H,  $\text{NOH}$ ), 7.4 (t,  $J = 5.9$  Hz, 1H,  $\text{HC}=\text{CNOH}$ , *syn* isomer), 6.7 (t,  $J = 5.2$  Hz, 1H,  $\text{HC}=\text{CNOH}$ , *anti* isomer), 5.0 (m, 1H,  $=\text{CH}$ , both isomers), 2.48 (m, 1H); 2.3 (m, 1H), 2.15 (m, 2H), 1.67 (d,  $J = 3.0$  Hz, 6H, Me);  $^{13}\text{C}$  NMR (125.8 MHz,  $\text{CDCl}_3$ )  $\delta$  202.6, 153.4, 152.6, 97.2, 97.1, 88.2, 88.0, 31.2, 29.5, 26.8, 26.2, 24.8, 21.37, 21.36 ppm; FT-IR (thin film):  $\nu$  3265, 3105, 2958, 2909, 8852, 1965, 1945, 1442, 1409, 1254, 1086, 1013, 862, 796, 698, 662  $\text{cm}^{-1}$ ; HMRS calcd for  $\text{C}_8\text{H}_{13}\text{NO}$  139.0997; found 139.0997.

**$\text{PPh}_3$  Reduction of 6 in the presence of AcOH.** 6,6-Dimethylfulvene (0.796 g, 7.5 mmol) was dissolved in 100 mL of dry  $\text{CH}_2\text{Cl}_2$ , 4 mg of *meso*-tetraphenylporphyrin was added and the solution was irradiated under a positive pressure of dry oxygen with a 400 W high-pressure sodium vapor lamp at  $-78^\circ\text{C}$  with stirring for 3 h. The progress of the reaction was monitored by TLC. After all starting material had reacted, 8.74 g (45 mmol) potassium diazocarboxylate ( $\text{K}^+\text{O}_2\text{CN}=\text{NCO}_2^-\text{K}^+$ ) was added to the cold photolysate, and to this slurry, of with and in situ reduction of the unsaturated endoperoxide with excess diazene, and 6.0 g (0.1 mol) of glacial acetic acid dissolved in 25 mL of dry  $\text{CH}_2\text{Cl}_2$  was added dropwise within 10 min. After complete addition, the mixture was gradually allowed to warm to  $-40^\circ\text{C}$  and held at that temperature for 30 min before the temperature was gradually raised to  $0^\circ\text{C}$  and the mixture stirred at this temperature for another 30 min. The white precipitate (KOAc) was filtered by suction at  $0^\circ\text{C}$  and the filter cake washed with cold  $\text{CH}_2\text{Cl}_2$ . The solution was transferred to a 250 mL round-bottomed flask equipped with a pressure-equalizing addition funnel. To this, solution of 1.967 g (7.5 mmol) of  $\text{PPh}_3$  in 10 mL was added to the solution and the mixture was stirred at  $0^\circ\text{C}$  for 30 min and then at room temperature overnight. The solution was then washed with 15 mL of saturated  $\text{NaHCO}_3$  solution, then 20

mL of H<sub>2</sub>O, and dried over anhydrous Na<sub>2</sub>SO<sub>4</sub>. After filtration, the solution was rotovapped, and the residue dissolved in 5 mL of 1:1 ether/PE-40-60°. The solution was stored in the freezer at -30 °C overnight, and the precipitated Ph<sub>3</sub>P=O was filtered off, the solvent rotovapped, and the residue subjected to column chromatography on silica gel (50% PE-40-60°/50% EtOAc). The products are listed below in order of elution from the column.

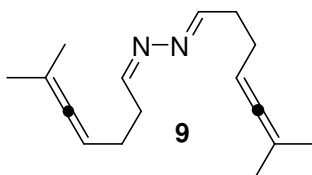

**6-Methyl-4,5-dienal azine (9).** 0.09g, 9.6%; <sup>1</sup>H NMR (300 MHz, CDCl<sub>3</sub>) δ 7.85 (t, J= 6.0 Hz, 2H, CH=N), 5.01 (m, 2H, CH=C=C), 2.46 (m, 4H, CH<sub>2</sub>-CH=N), 2.18 (m, 4H, CH<sub>2</sub>-C=C), 1.67 (d, J= 2.7 Hz, 12H, (CH<sub>3</sub>)<sub>2</sub>C=); <sup>13</sup>C NMR (75 MHz, CDCl<sub>3</sub>) δ 201.7 (C=C=C), 165.0 (CH=N), 96.1 (Me<sub>2</sub>C=C), 87.4 CH=C=C), 32.0 (CH<sub>2</sub>-CH=N), 26.2 (CH<sub>2</sub>-CH=C), 20.5 (CH<sub>3</sub>) ppm; FT-IR (thin film) ν 2974, 2925, 2909, 2852, 1965, 1740, 1695, 1650, 1442, 1364, 1332, 1228, 1185, 1115, 1033, 796, 723 cm<sup>-1</sup>; HRMS calcd for C<sub>16</sub>H<sub>24</sub>N<sub>2</sub> 244.1939; found 244.2939.

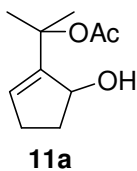

**2-(5-Hydroxycyclopent-1-enyl)propan-2-yl acetate (11a).**  $^1\text{H}$  NMR (300 MHz,  $\text{CDCl}_3$ )  $\delta$  5.85 (t,  $J$ = 2.1 Hz, 1H), 4.79 (m, 1H), 2.64 (br.s, 1H, OH), 2.5 (m, 1H), 2.1-2.3 (m, 2H), 2.00 (s, 3H), 1.85 (m, 1H), 1.622 (s, 3H), 1.621 (s, 3H);  $^{13}\text{C}$  NMR (75 MHz,  $\text{CDCl}_3$ )  $\delta$  171.2, 149.6, 131.9, 130.7, 80.8, 77.4, 35.1, 30.3, 28.6, 27.6 ppm; FT-IR (thin film)  $\nu$  3432, 3048, 2974, 2938, 2856, 1732.1, 1454, 1430, 1254, 1197, 1131, 1042, 1009, 960, 935, 841, 809  $\text{cm}^{-1}$ ; HRMS calcd for  $\text{C}_{10}\text{H}_{17}\text{O}_3$  184.1099; found 185.1184.

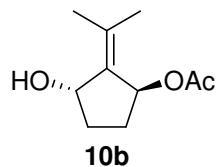

***trans*-3-Hydroxy-2-(propan-2-ylidene)cyclopentyl acetate (10b).**  $^1\text{H}$  NMR (300 MHz,  $\text{CDCl}_3$ )  $\delta$  5.8 (m, 1H), 4.8 (m, 1H), 1.8-2.1 (m, 4H), 2.02 (s, 3H), 1.96 (s, 3H), 1.72 (s, 3H);  $^{13}\text{C}$  NMR (75 MHz,  $\text{CDCl}_3$ )  $\delta$  171.3, 139.2, 138.8, 72.2, 75.4, 34.5, 32.1, 22.2, 22.1, 21.7 ppm.

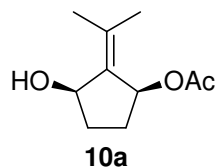

***cis*-3-Hydroxy-2-(propan-2-ylidene)cyclopentyl acetate (10a).**  $^1\text{H}$  NMR (500 MHz,  $\text{CDCl}_3$ )  $\delta$  5.6 (t,  $J$ = 5.6 Hz, 1H), 4.7 (t,  $J$ = 4.5 Hz, 1H), 2.05 (s, 3H), 1.83-2.10 (m, 4H), 1.9 (s, 3H), 1.7 (s, 3H);  $^{13}\text{C}$  NMR (125.8 MHz,  $\text{CDCl}_3$ )  $\delta$  171.5, 137.8, 137.3, 75.7, 72.6, 34.1, 31.3, 22.0, 21.9, 21.7 ppm; FT-IR (thin film)  $\nu$  3422, 2964, 2935, 2854, 1732, 1441, 1374, 1243, 1170, 1151, 1108, 1070, 1040, 1016, 979, 954, 920, 894, 743  $\text{cm}^{-1}$ ; HMRS calcd for  $\text{C}_{10}\text{H}_{16}\text{O}_3$  184.1099. Found 185.1184.

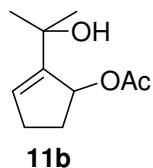

**2-(2-Hydroxypropan-2-yl)cyclopent-2-enyl acetate (11b).**  $^1\text{H}$  NMR (300 MHz,  $\text{CDCl}_3$ )  $\delta$  5.9 (narrow m, 1H), 5.46 (m, 1H), 2.0 (s, 3H), 1.8-2.7 (m, 4H), 1.61 (s, 3H), 1.54 (s, 3H);  $^{13}\text{C}$  NMR (75 MHz,  $\text{CDCl}_3$ )  $\delta$  171.3, 140.2, 129.6, 83.7, 77.2, 31.6, 30.8, 28.4, 28.1, 21.7 ppm.

**Synthesis of Endoperoxide 21** (see also ref. 19). In a 500 mL round-bottomed flask, equipped with a magnetic spin-bar and a rubber septum, spiro[2.4]hepta-4,6-diene (.691 g, 7.5 mmol) was dissolved in 250 mL of dry  $\text{CH}_2\text{Cl}_2$ , and 4 mg of *meso*-tetraphenylporphyrin was added. The solution was purged with dry oxygen, and a balloon filled with dry oxygen was inserted through the rubber septum by means of a syringe needle. The flask was immersed in a flat Dewar flask containing dry-ice/acetone and irradiated with a 400 W Na high-pressure vapor lamp while stirring. The progress of the oxygen uptake was monitored by means of TLC. When all the starting

material was consumed, 8.7g of potassium azodicarboxylate ( $\text{K}^+\text{O}_2\text{CN}=\text{NCO}_2^-\text{K}$ ) was added to the photolysate at  $-78\text{ }^\circ\text{C}$ , and the oxygen balloon replaced by a pressure-equalizing addition funnel containing 5.1g of glacial acetic acid in 10 mL of dry  $\text{CH}_2\text{Cl}_2$  and equipped with a drying tube. The acetic acid solution was added to the mixture dropwise within 5 min, and the bath temperature gradually raised to  $-40\text{ }^\circ\text{C}$  while stirring. Vigorous gas evolution was observed during gradual warm-up to  $0\text{ }^\circ\text{C}$ . Then the mixture was stirred at  $0\text{ }^\circ\text{C}$  for another 30 min, the salt (KOAc) was filtered by suction, keeping the filter flask in an ice bath. The mixture was then placed in a 500 mL round-bottomed flask immersed in an ice-bath, and 0.45g (7.5 mmol) of glacial acetic acid followed by 1.96g (7.5 mmol) of  $\text{PPh}_3$  was added. After stirring overnight at room temperature, the solution was extracted with saturated  $\text{NaHCO}_3$  (1x50 mL), dried over anhydrous  $\text{Na}_2\text{SO}_4$  and filtered by gravity. The solvent was rotovapped, the residue subjected to chromatography on silica gel, eluting with 1:1 pet.ether(40-60 $^\circ$ )/EtOAc. The products isolated are listed below in order of their  $R_f$  values.

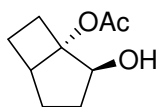**22**

***trans*-2-Hydroxybicyclo[3.2.0]heptan-1-yl acetate (22).** 122 mg (13% yield).  $^1\text{H}$  NMR (300 MHz,  $\text{CDCl}_3$ )  $\delta$  4.0 (m, 1H), 3.83 (br. s, 1H, OH), 2.71 (m, 1H), 2.63 (m, 1H), 2.1 (m, 2H), 2.0 (s, 3H), 1.8-2.0 (m, 2H), 1.7 (m, 1H), 1.2-1.5 (m, 2H);  $^{13}\text{C}$  NMR (75 MHz,  $\text{CDCl}_3$ )  $\delta$  173.5 (s), 90.9 (s), 79.3 (d), 43.4 (d), 32.4 (t), 27.6 (t), 24.9 (t), 21.9 (q), 19.0 (t) ppm; FT-IR (thin film)  $\nu$  3510, 2954, 2860,



1731, 1716 (sh), 1387, 1368, 1344, 1266, 1246, 1181, 1107, 1066, 1042, 1017  $\text{cm}^{-1}$ ; Anal. calcd for  $\text{C}_9\text{H}_{14}\text{O}_3$  C 63.51; H 9.29; found C 63.48, H 9.24; MS (ei): 171 (M+1), 153, 128, 111, 94, 81, 65.

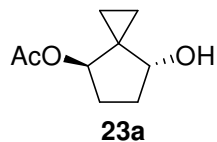

***trans*-7-Hydroxyspiro[2.4]heptan-4-yl acetate (23a).** 357 mg (28% yield).  $^1\text{H}$  NMR (300 MHz,  $\text{CDCl}_3$ )  $\delta$  4.9 (dd,  $J$ = 6.0, 2.1 Hz, 1H), 3.93 (dd,  $J$ = 5.7, 4.0 Hz, 1H), 2.3 (m, 1H), 2.1 (m, 1H), 2.0 (s, 3H), 1.7 (m, 2H), 0.86 (m, 1H), 0.81 (m, 1H), 0.6 (m, 2H);  $^{13}\text{C}$  NMR (75 MHz,  $\text{CDCl}_3$ )  $\delta$  170.6, 80.5, 76.8, 43.5, 33.8, 30.9, 21.9, 8.9, 8.4 ppm; FT-IR (thin film)  $\nu$  3424, 3080.6, 2966, 2942, 1732, 1715 (sh), 1434, 1377, 1307, 1246, 1160, 1086, 1025, 976  $\text{cm}^{-1}$ ; HMRS calcd for  $\text{C}_9\text{H}_{14}\text{O}_3$  170.0943; found 171.1022; MS (ei) 153 (M+1), 127, 110, 95, 81, 65, 53.

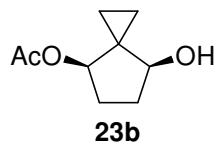

***cis*-7-Hydroxyspiro[2.4]heptan-4-yl acetate (23b).** 344 mg (27% yield).  $^1\text{H}$  NMR (300 MHz,  $\text{CDCl}_3$ )  $\delta$  4.73 (dd,  $J$ = 6.0 Hz, 2.4 Hz, 1H), 3.58 (t,  $J$ = 2.4 Hz, 1H), 1.7-2.2 (m, 4H), 2.0 (s, 3H), 0.6-0.9 (m, 4H);  $^{13}\text{C}$  NMR (75 MHz,  $\text{CDCl}_3$ )  $\delta$  171.5 (s), 82.9 (d), 80.1 (d),

34.4 (t), 34.7 (s), 22.0 (q), 15.3 (t), 5.82 (t) ppm; FT-IR (thin film)  $\nu$  3432, 3076.5, 2962, 2938, 2868, 1728, 1712 (sh), 1434, 1373, 1242, 1176, 1078, 1025, 972  $\text{cm}^{-1}$ ; HRMS calcd for  $\text{C}_9\text{H}_{14}\text{O}_3$  170.0943; found 173.1166.

**Triphenylphosphine reduction of 2,3-dioxabicyclo[2.2.1]heptane (3).** Cyclopentadiene (0.62 mL, 7.55 mmol) was photooxygenated and then reduced with diazene, generated in situ from potassium azodicarboxylate (8.74 g, 45 mmol) and 4.9 mL of acetic acid (85 mmol), as described for spiro[2.4]hepta-4,6-diene. After KOAc was suction filtered and the filtrate washed with 15 mL of a saturated aqueous solution of  $\text{NaHCO}_3$ , the organic layer was dried of anhydrous  $\text{Na}_2\text{SO}_4$ . After filtration, the  $\text{CH}_2\text{Cl}_2$  solution of the saturated endoperoxide **3** was placed into a 500 mL round-bottomed flask equipped, the flask cooled in an ice-bath, a few drops of  $\text{H}_2\text{O}$  were added followed by  $\text{PPh}_3$  (1.967 g, 7.5 mmol) at 0 °C while stirring. The mixture was first stirred at 0 ° for an hour, and at room temperature overnight. The solvent was rotovapped, the residue taken up in 5 mL of ethyl acetate/petroleum ether 40-60° (1:1), and the solution left in the freezer at -30 °C for two hours. Afterwards, the bulk of  $\text{PPh}_3=\text{O}$  that had precipitated was filtered off, and the residue purified on a silica gel column eluting with a 1:1 mixture of EtOAc/pet. ether 40-60° to give 708 mg (92% yield) of *cis*-cyclopentane-1,3-diol (**28a**). This compound was identical to an authentic sample (*vide infra*) in all respects, with no traces of the *trans* isomer.

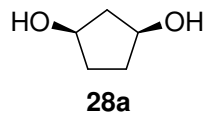

**cis-Cyclopentane-1,3-diol (28a).**  $^1\text{H}$  NMR (300 MHz,  $\text{CDCl}_3$ )  $\delta$  4.340 (s, 2H), 3.8 (br. s, 2H, OH), 1.87 (s, 4H), 1.80 (m, 2H);  $^{13}\text{C}$  NMR (75 MHz,  $\text{CDCl}_3$ )  $\delta$  73.8, 44.46, 34.13 ppm.

**Triphenylphosphine reduction of 2,3-dioxabicyclo[2.2.2]octane (27).** The saturated endoperoxide derived from cyclohexadiene was prepared as described. Endoperoxide **27** (0.2 g, 1.75 mmol) was dissolved in 15 mL of  $\text{CH}_2\text{Cl}_2$ . After adding a few drops of  $\text{H}_2\text{O}$ , 0.46 g (1.75 mmol) of  $\text{PPh}_3$  was added, and the mixture was stirred at room temperature overnight. The solvent was removed, the residue purified by preparative TLC, eluting with 1:1 EtOAc/pet.ether 40-60° to give 0.16 g (79%) cis-cyclohexane-1,4-diol (**28b**).

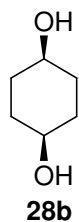

**cis-Cyclohexane-1,4-diol (28b)**  $^1\text{H}$  NMR (500 MHz,  $\text{CDCl}_3$ )  $\delta$  3.79 (s, 2H), 1.66 (m, 2H), 1.62 (m, 2H), 1.52 (br. s, 2H, OH);  $^{13}\text{C}$  NMR (128.5 MHz,  $\text{CDCl}_3$ )  $\delta$  67.4, 30.3 ppm.

### Independent synthesis of *cis*-diol **28a**.

a) Cyclopentadiene (0.62 mmol, 7.5 mmol) was dissolved in 250 mL of methanol, 0.628 g (8.25 mmol) of thiourea and 5 mg of rose bengal were added, and the mixture was photooxygenated at -78 °C for 3 h. After the solvent was rotovapped, the residue was purified on a silica gel column (1:1 EtOAc/pet. ether 40-60°) to give 0.437 g (69.4%) of **34a**.

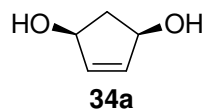

*cis*-Cyclopentene-1,3-diol (**34a**). <sup>1</sup>H NMR (300 MHz, CDCl<sub>3</sub>) δ 6.0 (t, J= 2.4 Hz, 2H), 4.64 (m, quint., J= 3.6 Hz, 2H), 3.4 (br. s, 2H, OH), 2.7 (m, 1H), 1.55 (d, <sup>2</sup>J= 14.4 Hz, 1H); <sup>13</sup>C NMR (75 MHz, CDCl<sub>3</sub>) δ 137.0, 75.6, 44.1 ppm.

b) **Diazene reduction of *cis*-cyclopentene-1,3-diol (**34a**)**. Diol **34a** (0.436g, 4.36 mmol) was dissolved in 50 mL of dry methanol. After cooling to 0 °C in an ice bath, potassium azodicarboxylate (5g, 26.16 mmol) was added, and while stirring, glacial acetic acid 3 mL (52.32 mmol) was added dropwise. The mixture was then stirred for 2 hours, filtered and the solvent rotovapped. The resulting product (0.420 mg, 94%) was identical to the *cis*-cyclopentane-1,3-diol (**28a**) obtained by PPh<sub>3</sub> reduction of **3** (*vide supra*).

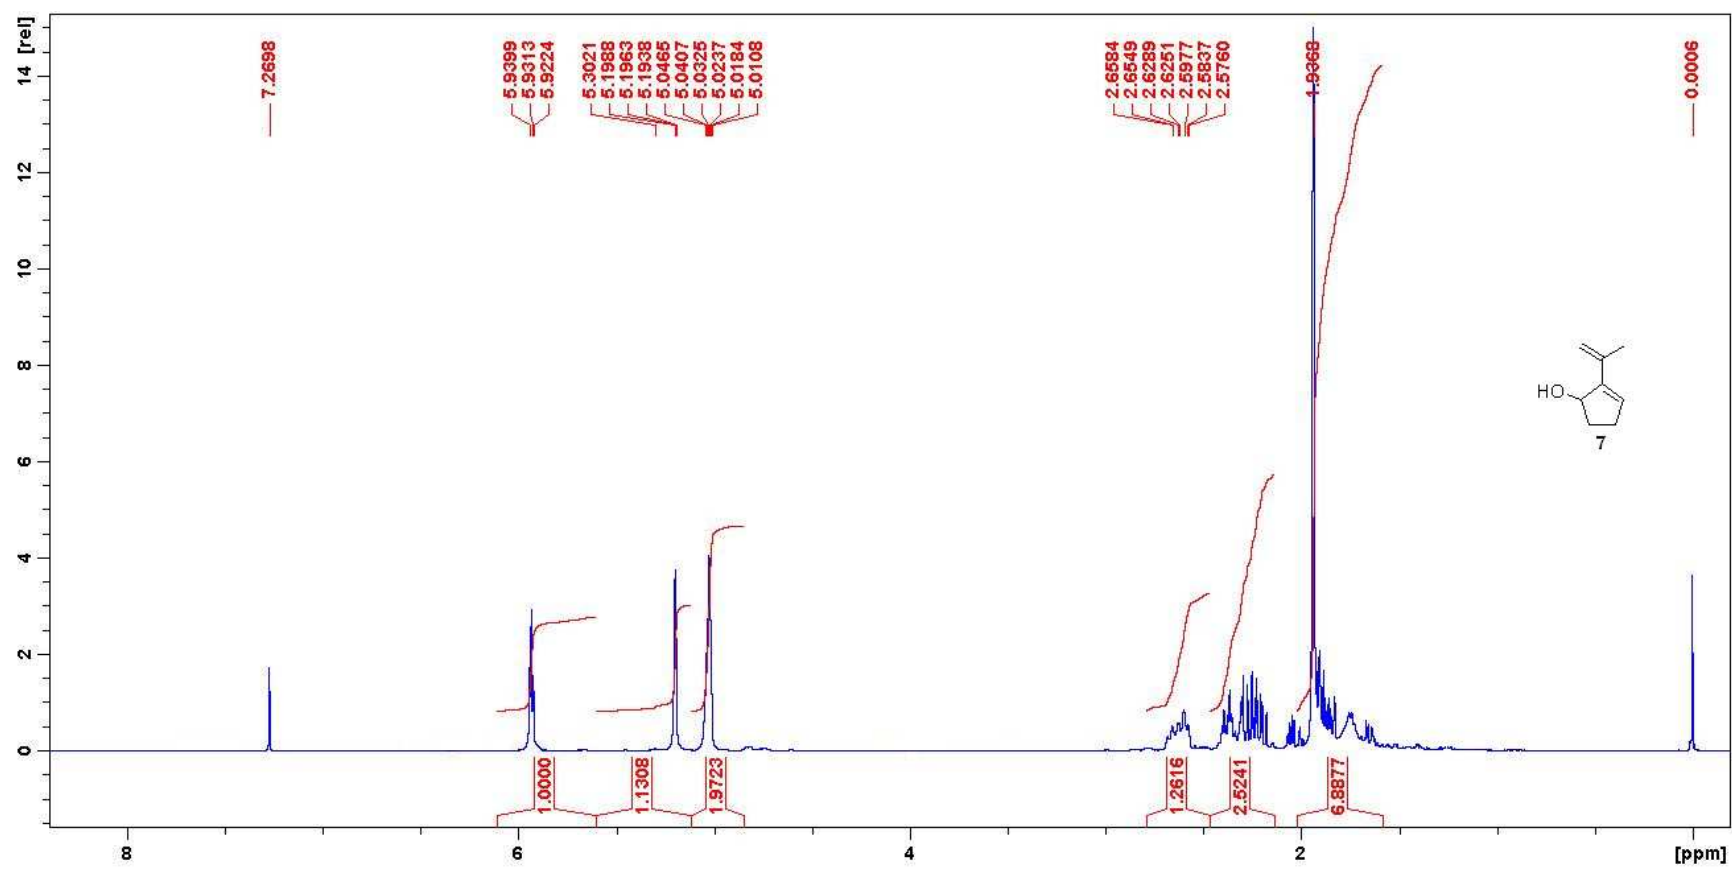

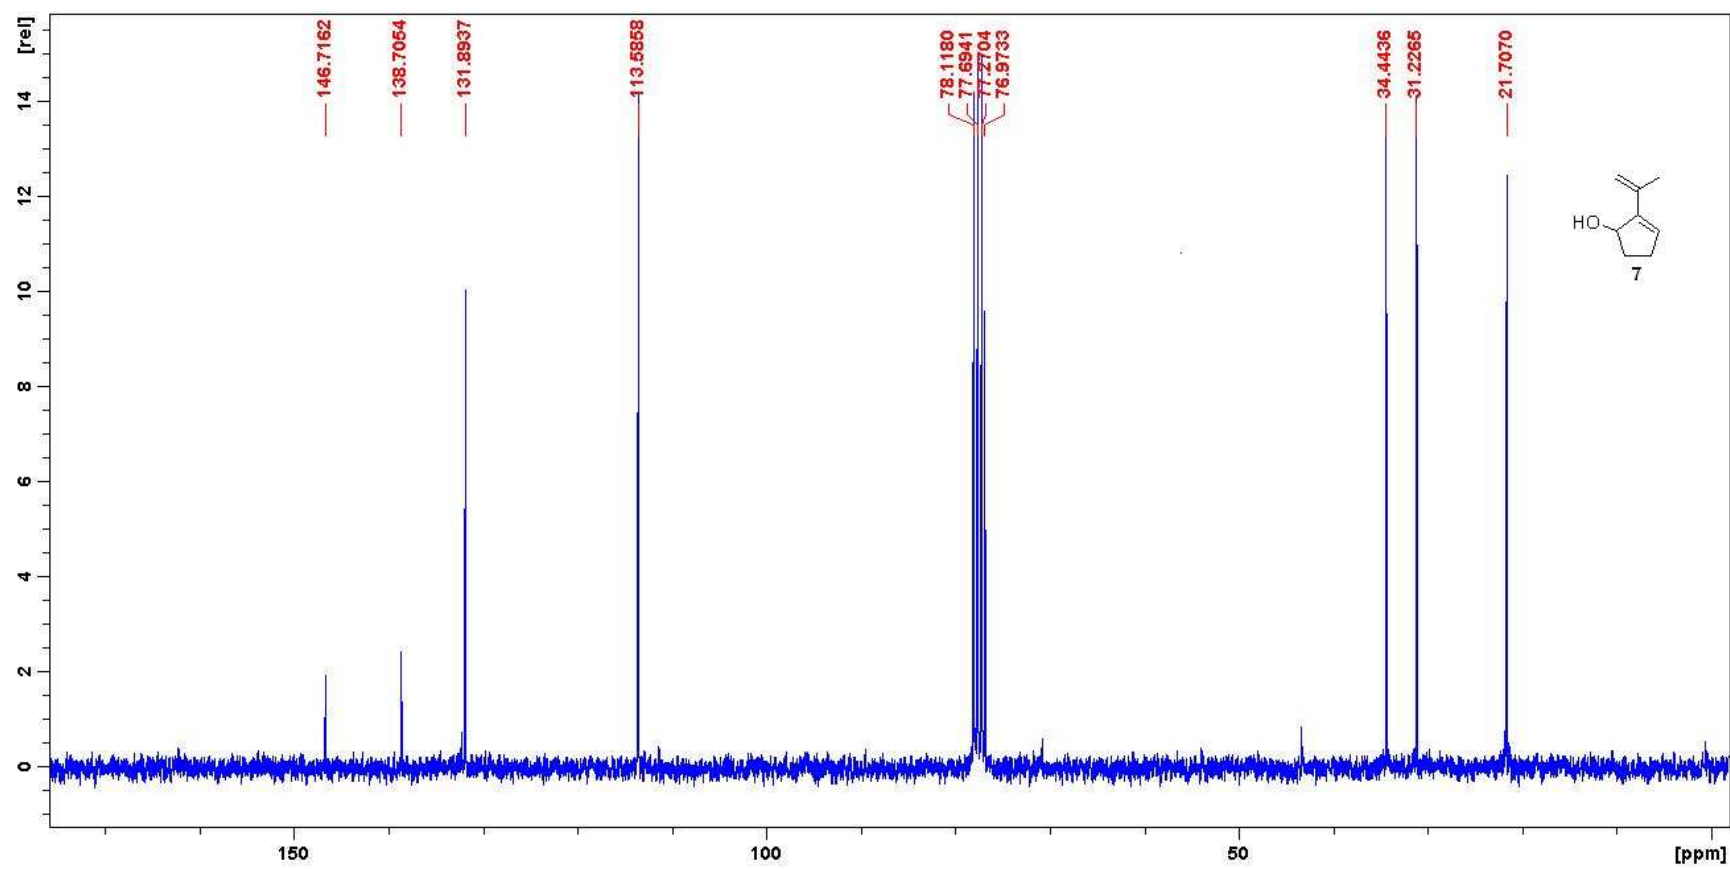

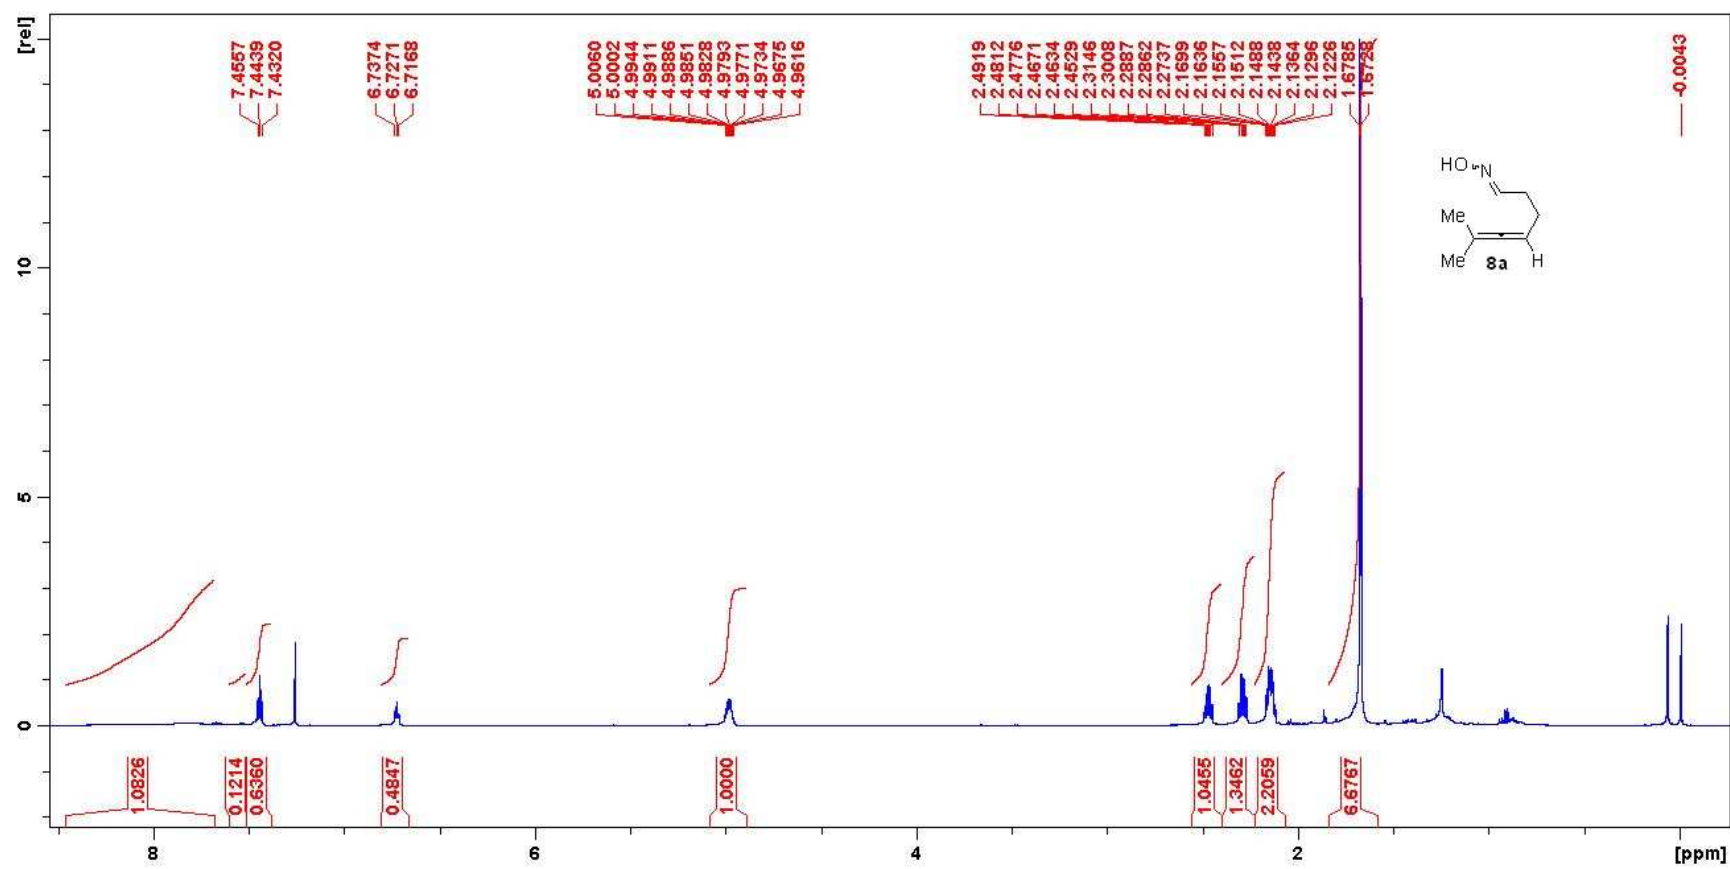

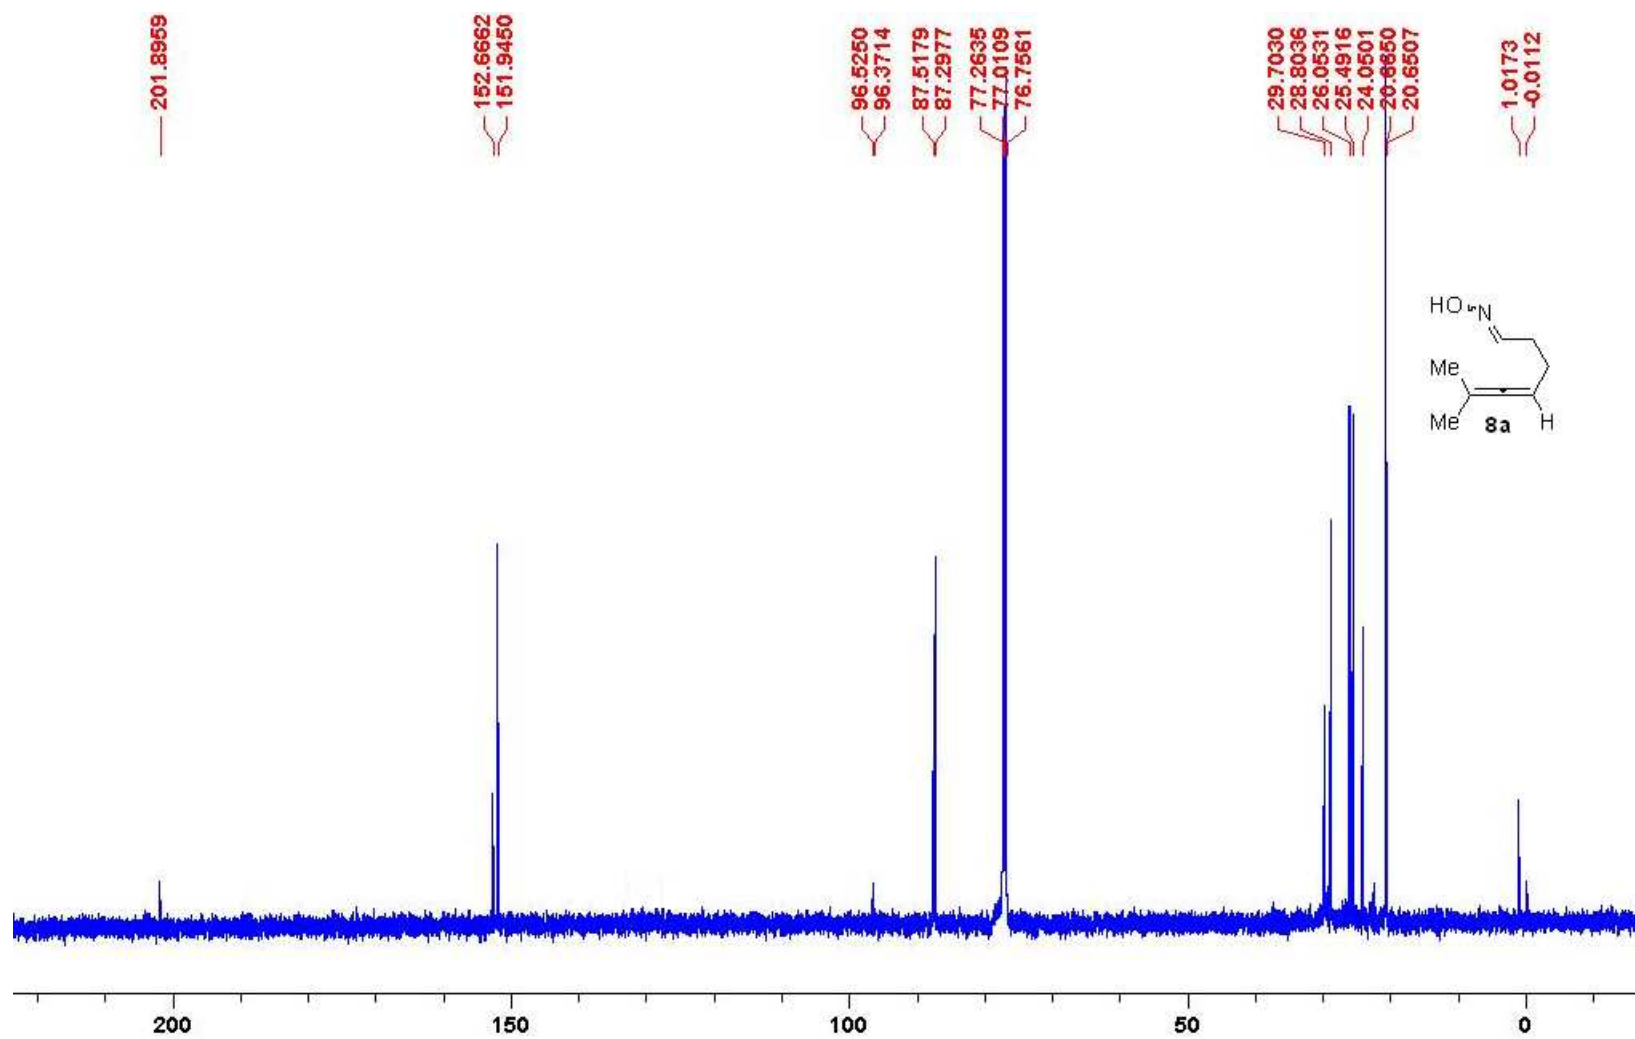



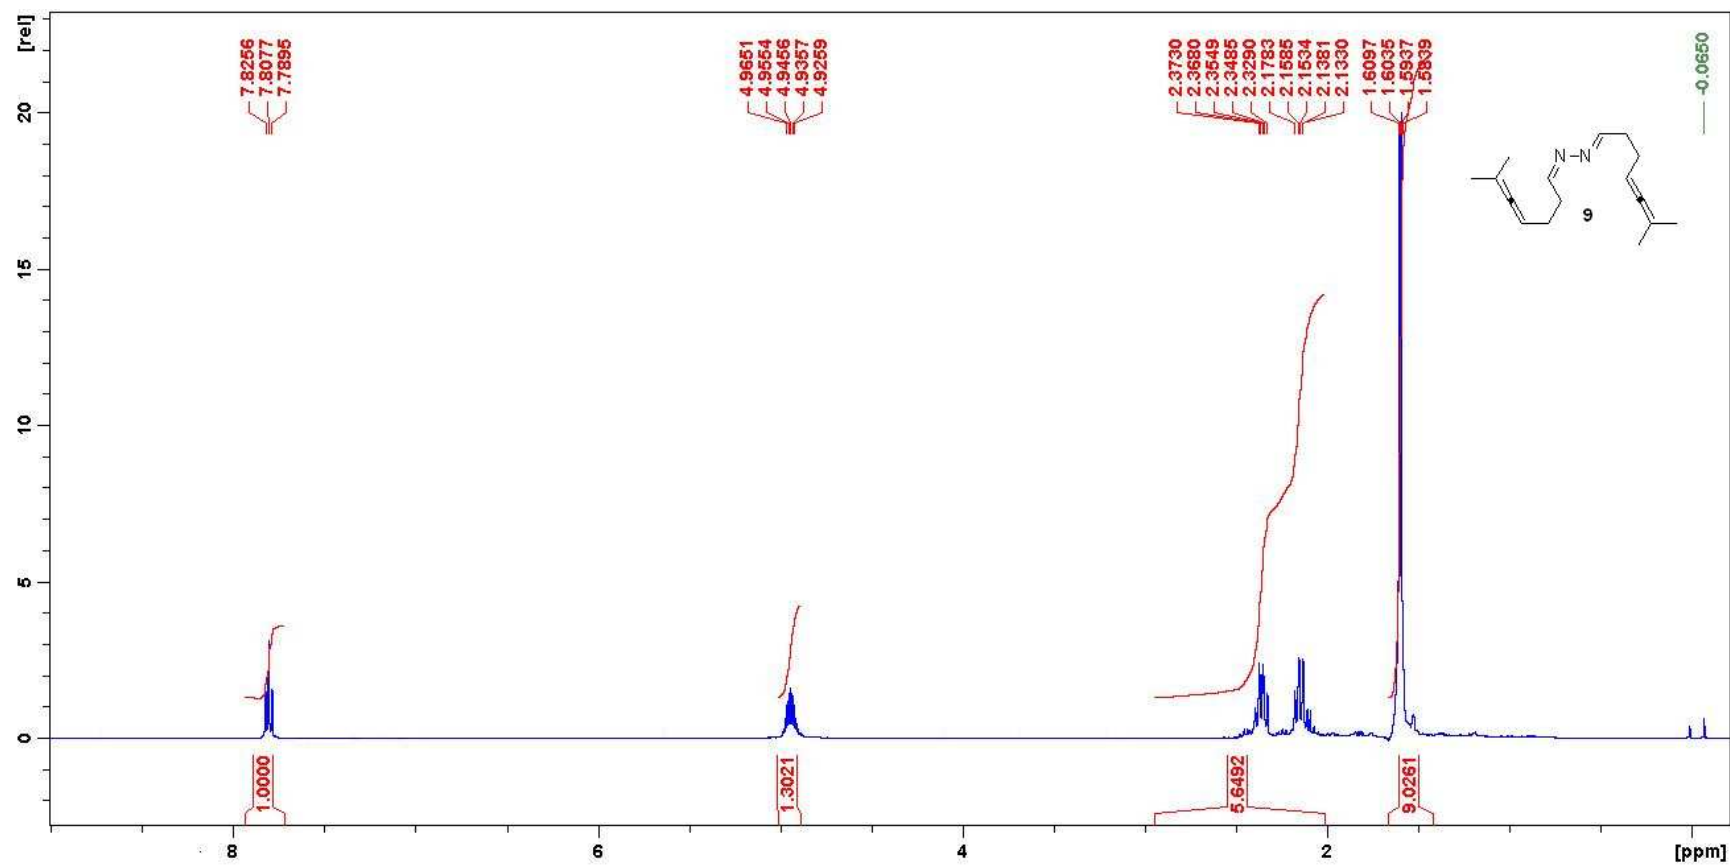

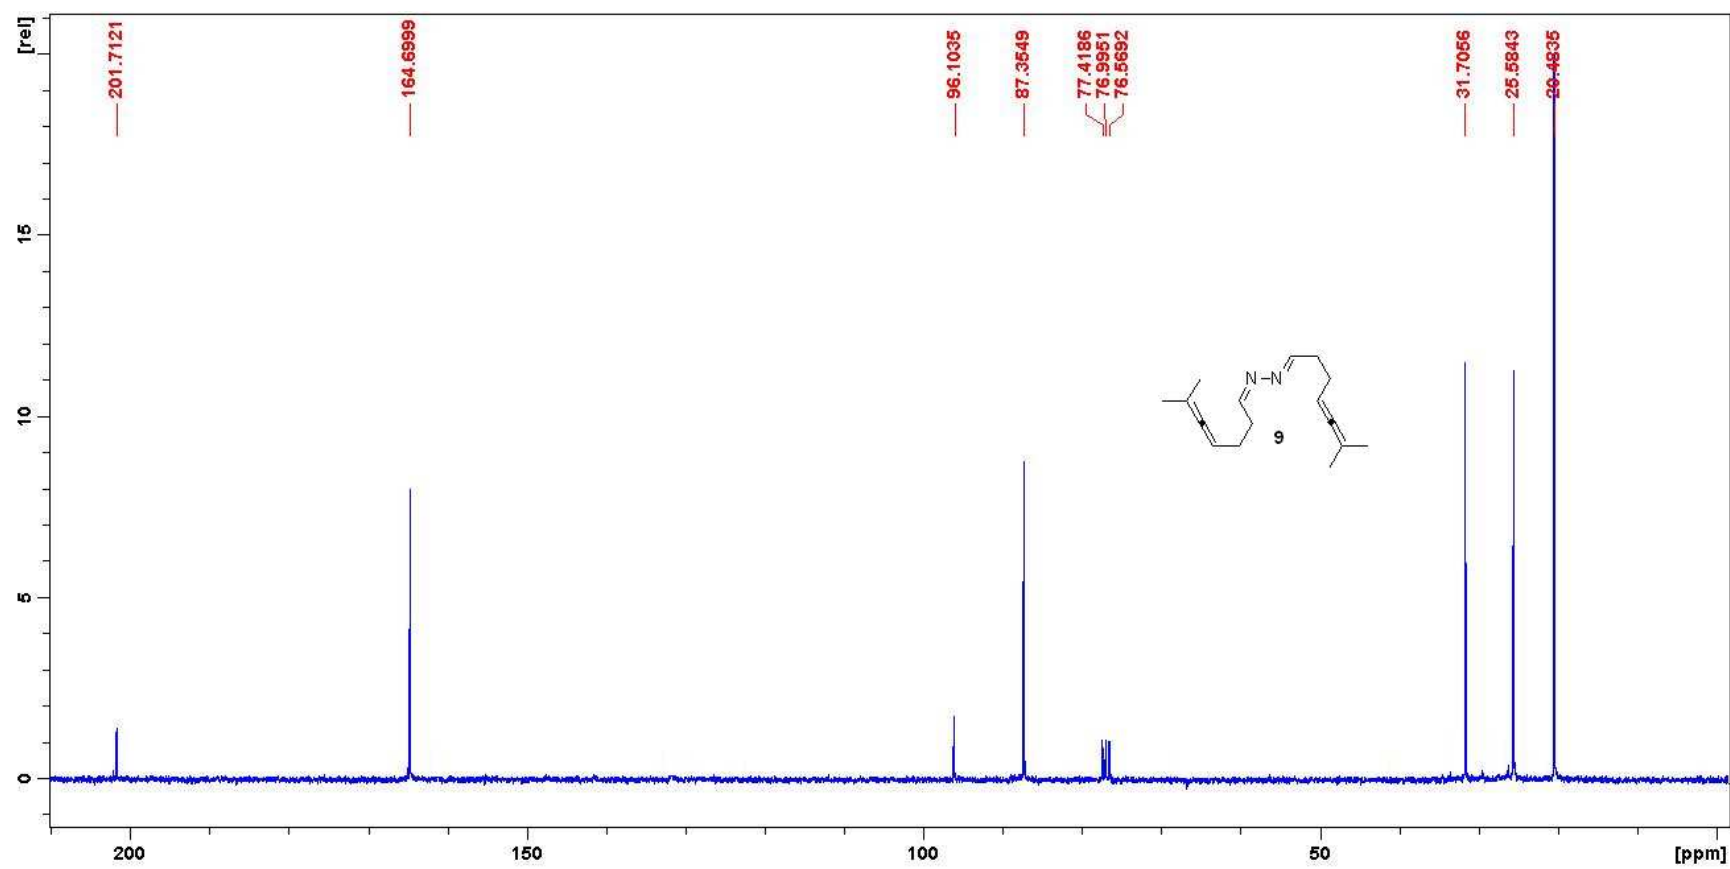

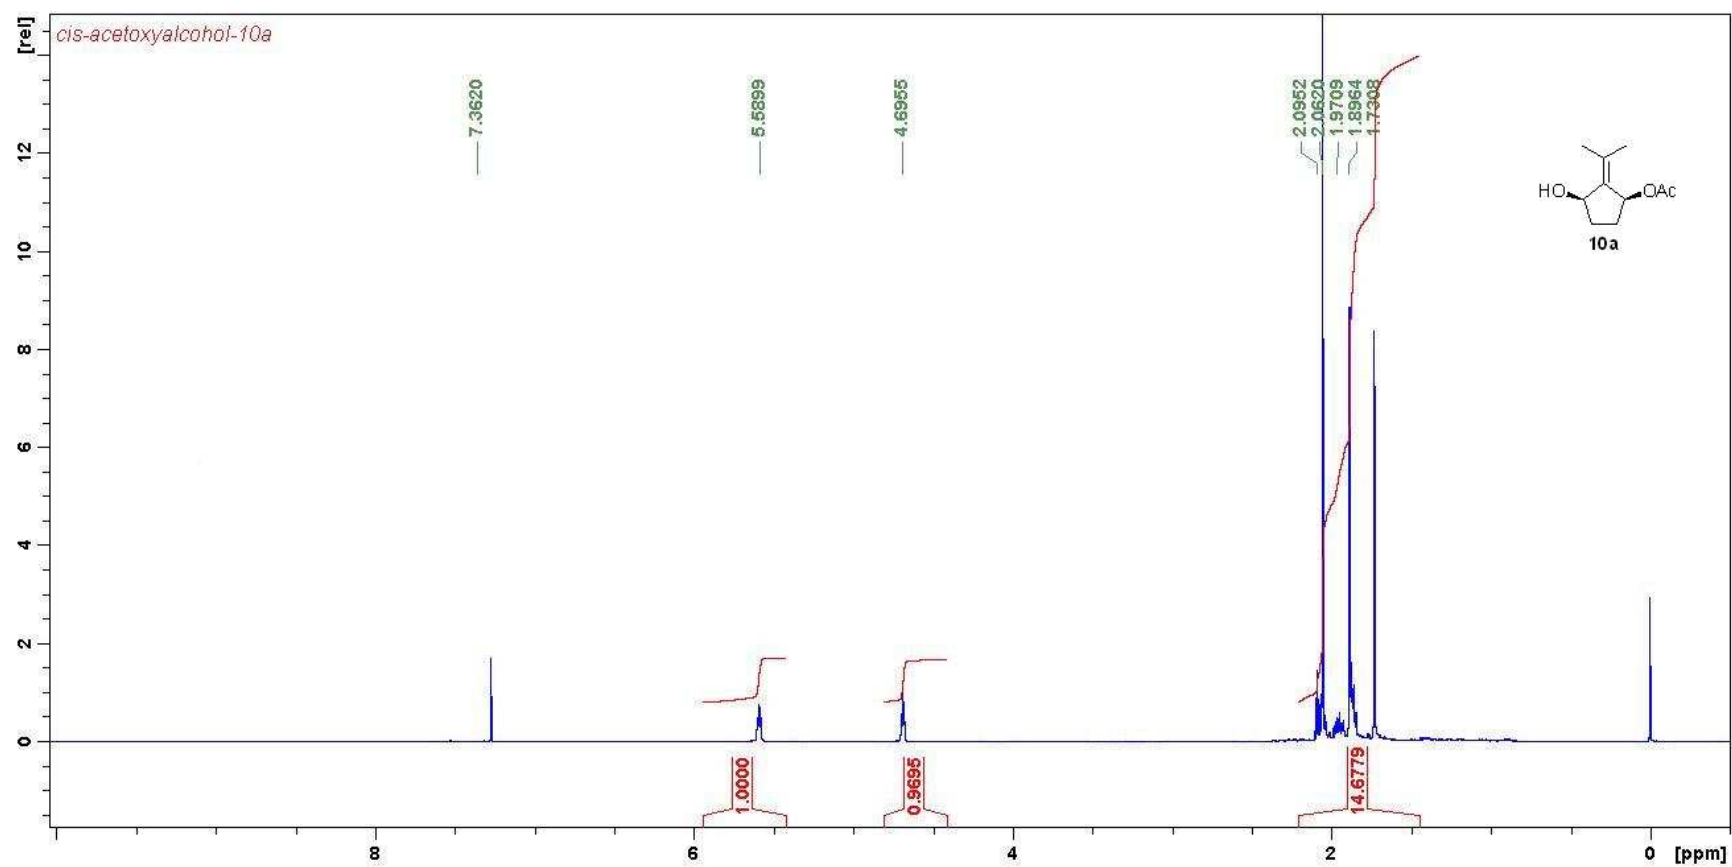

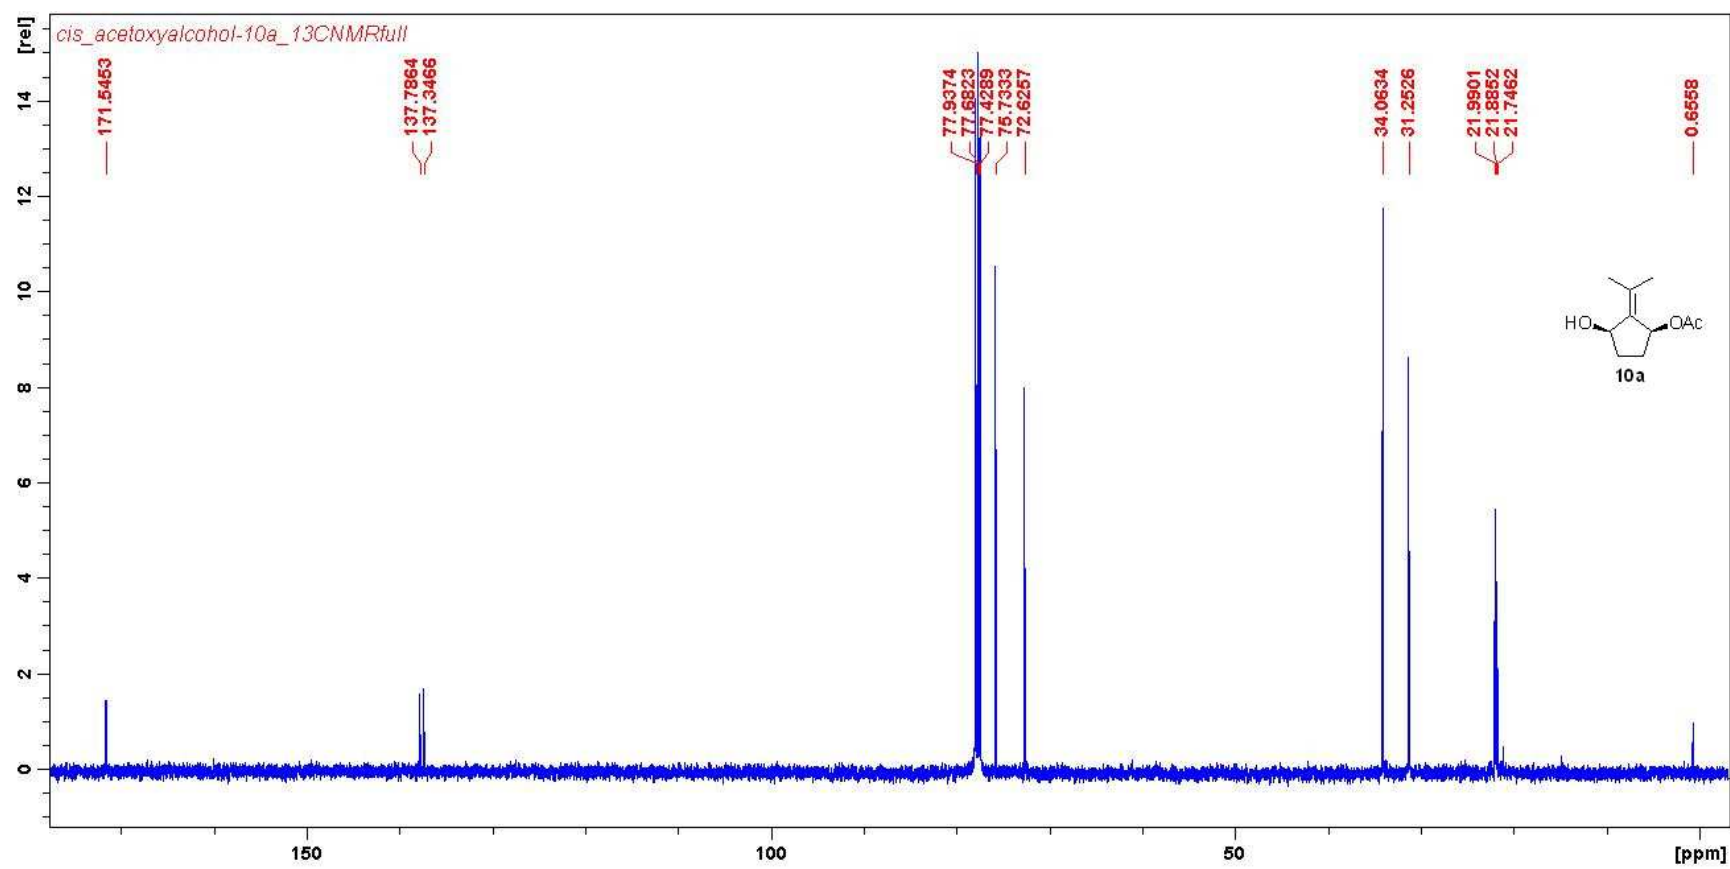

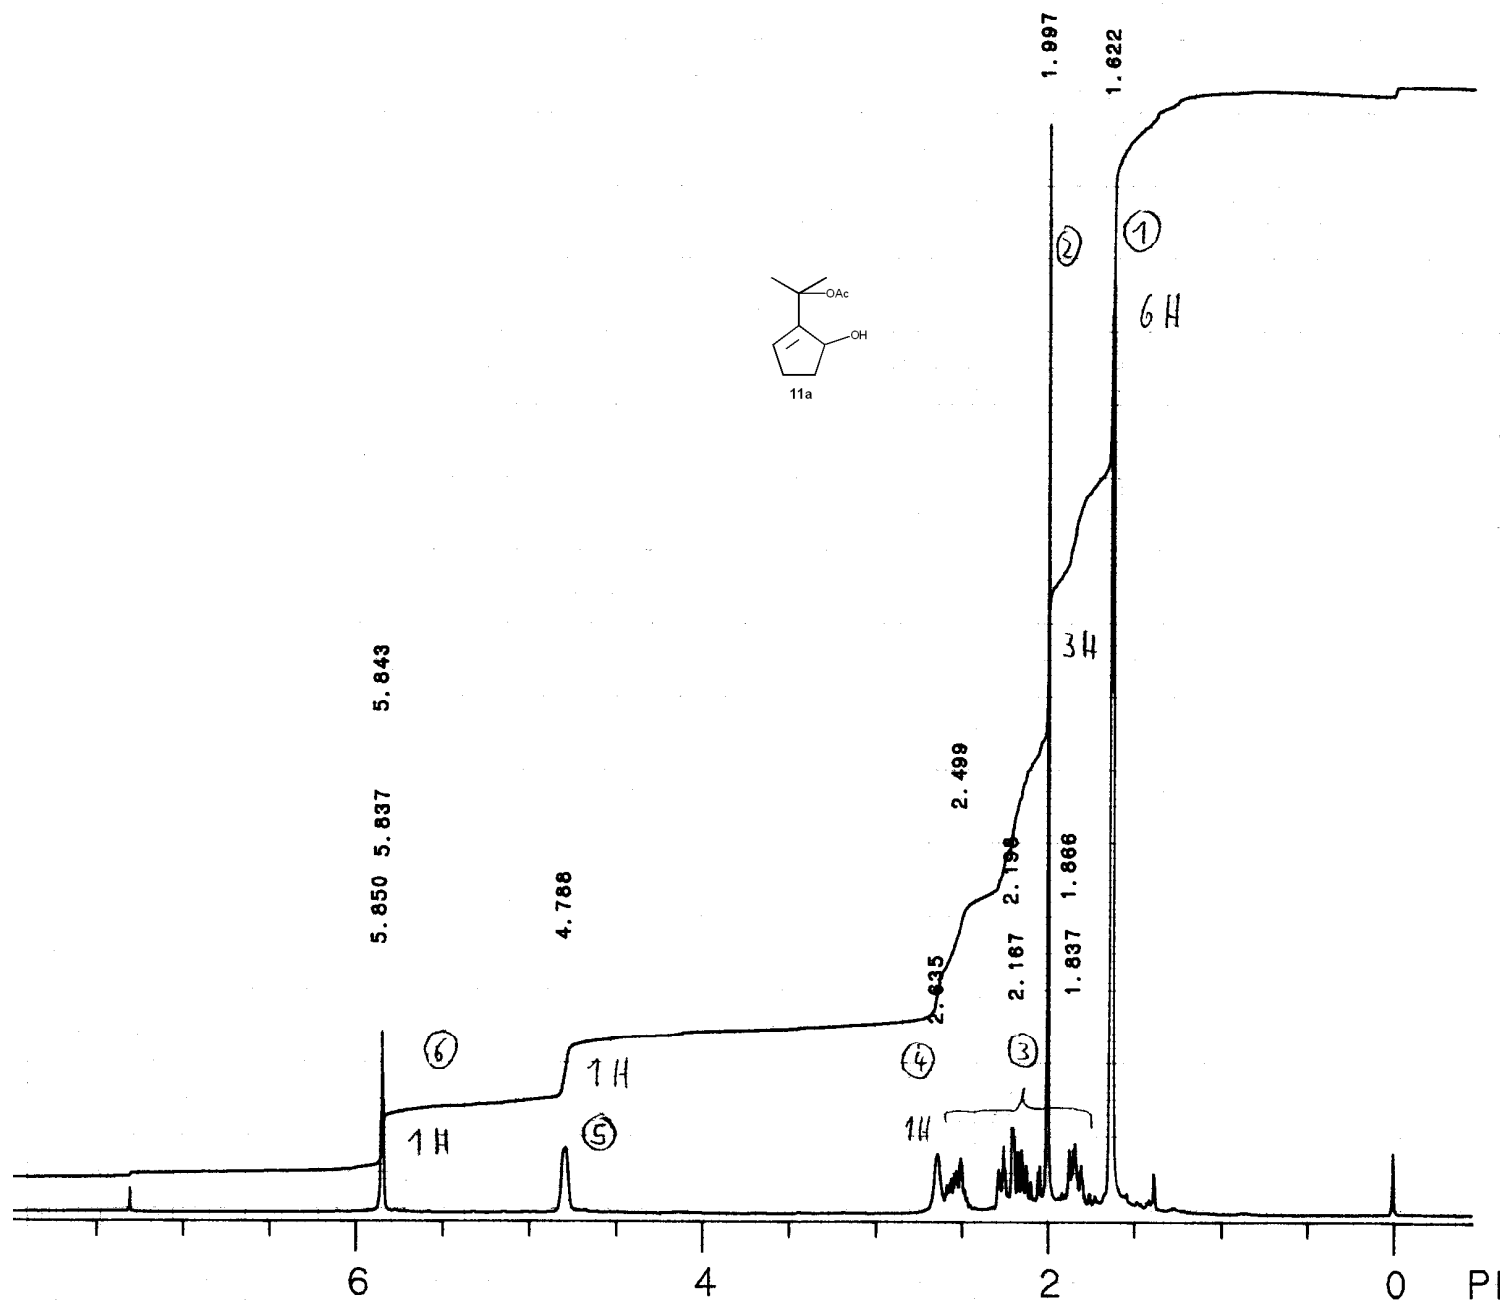

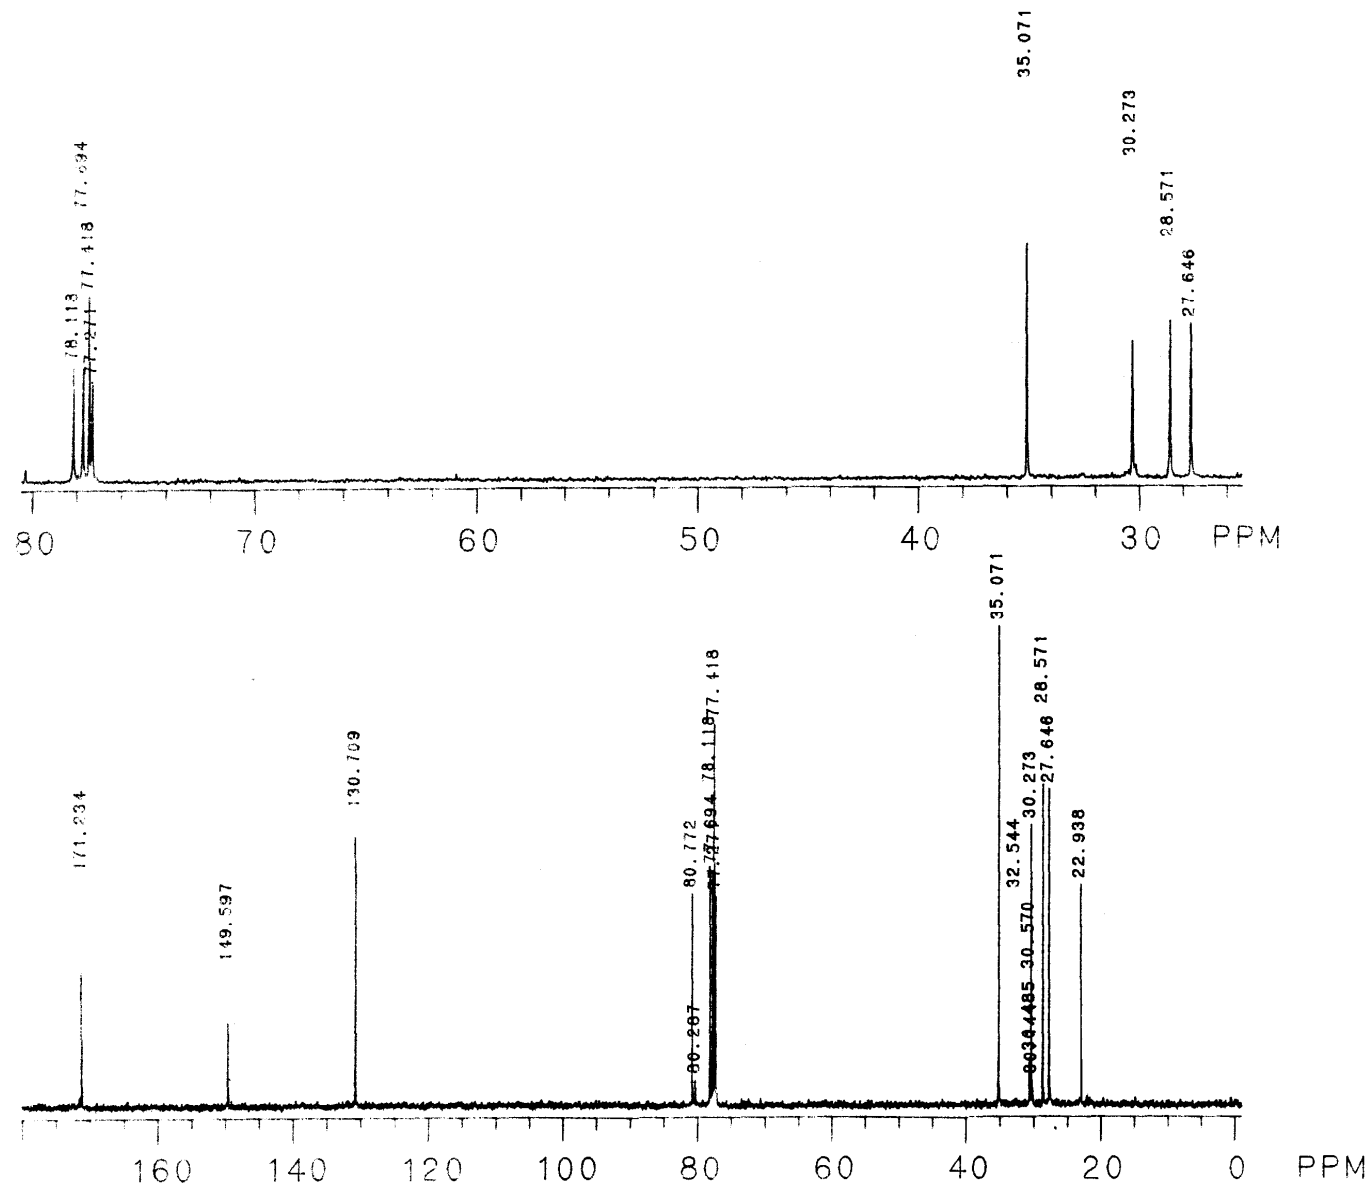

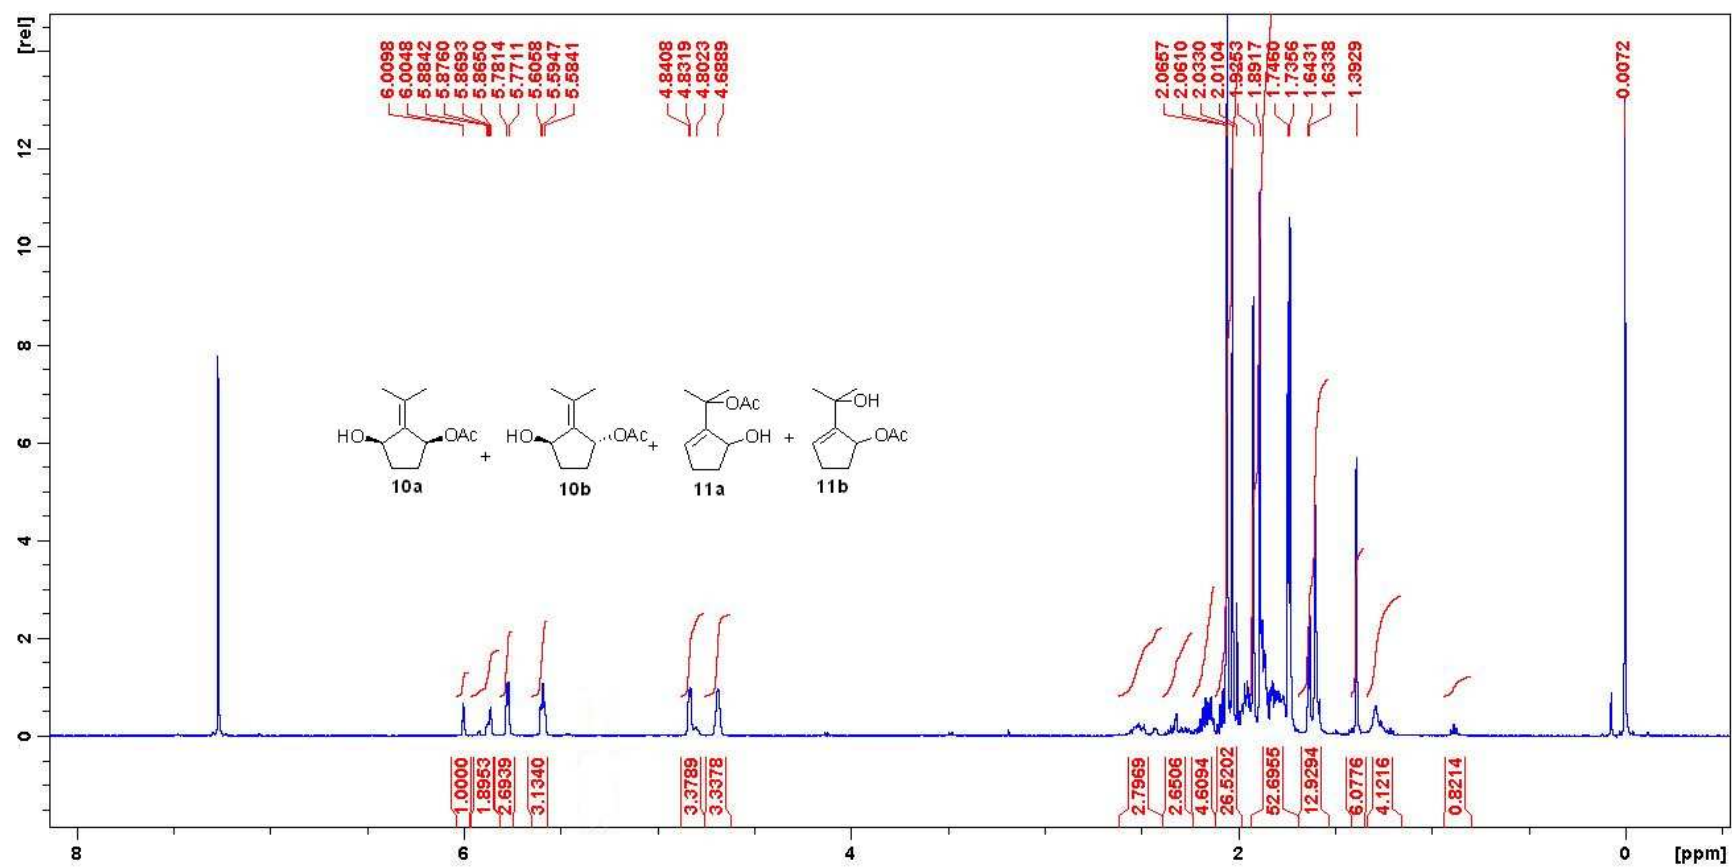

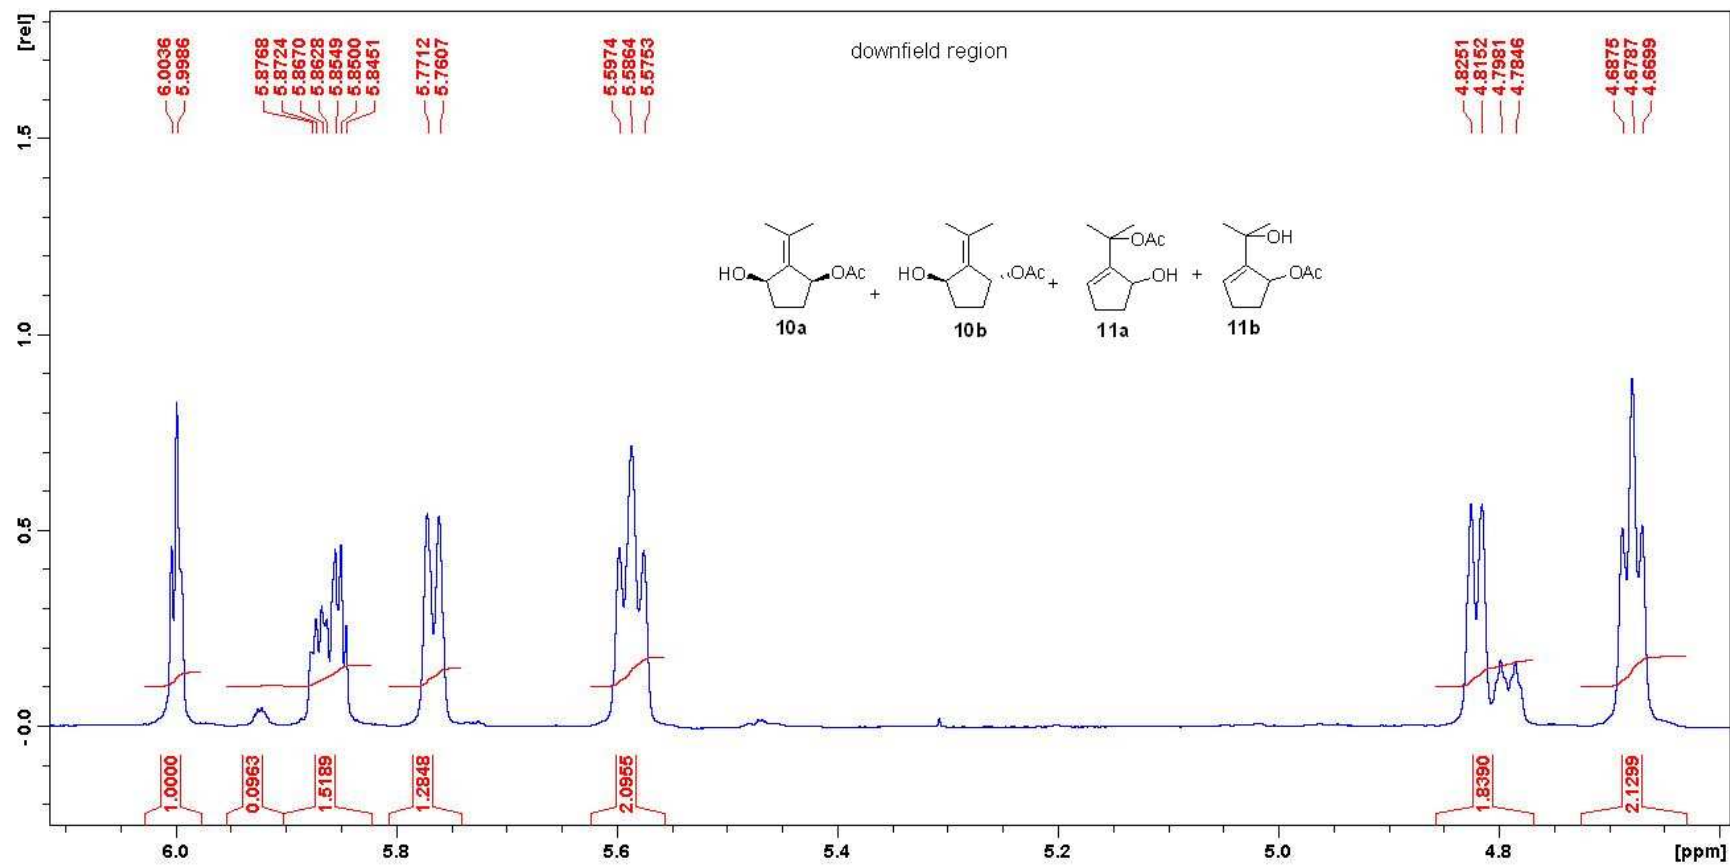



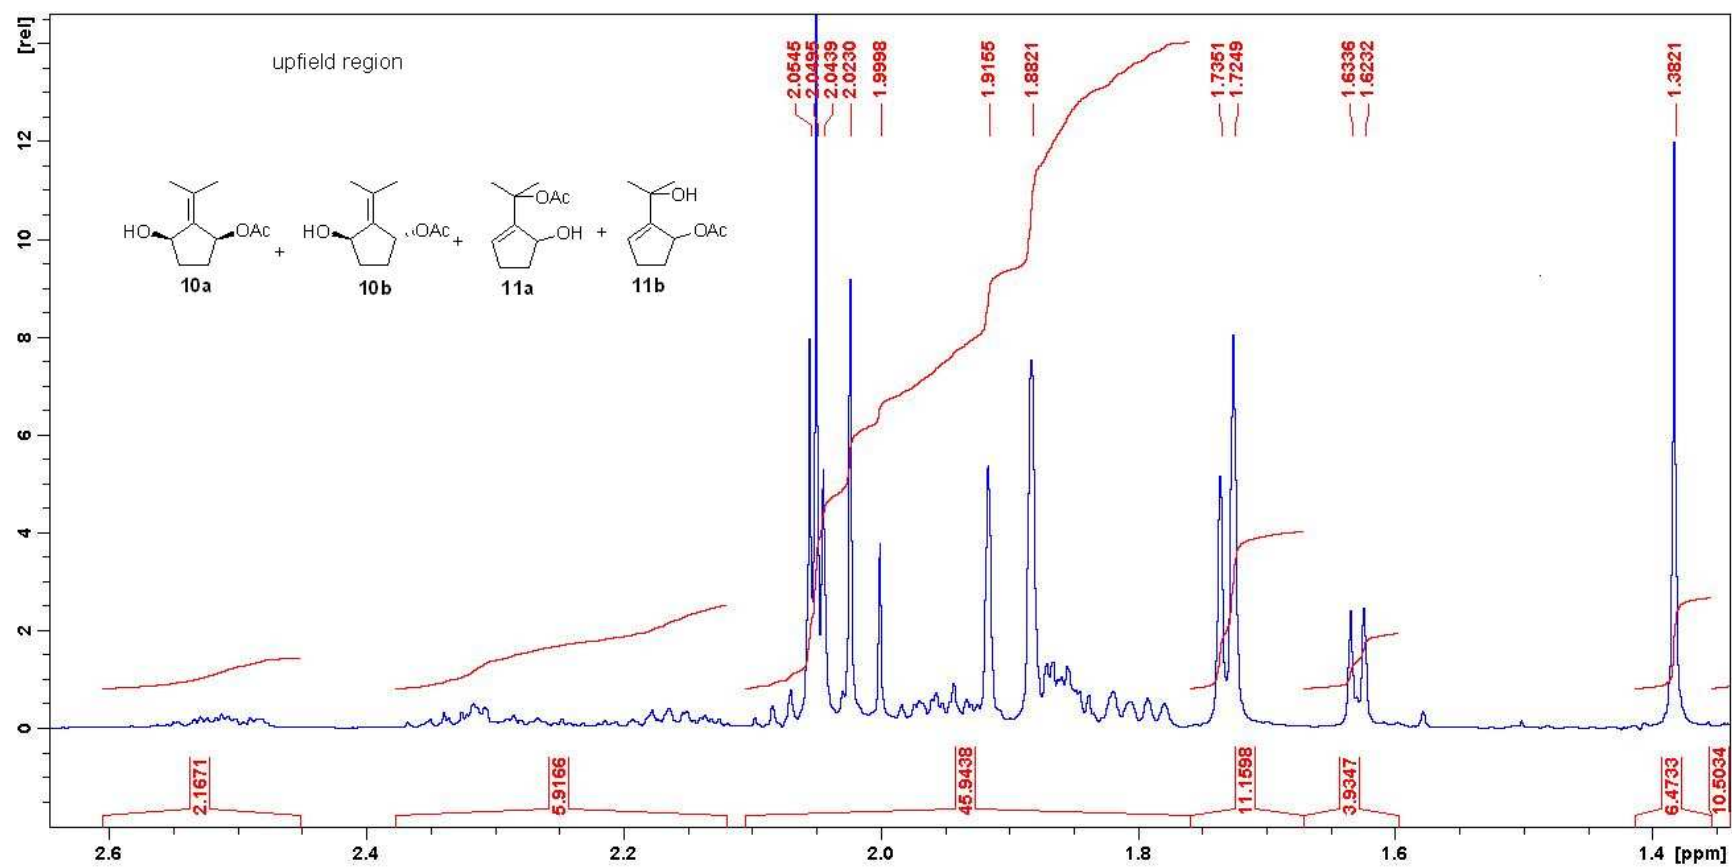

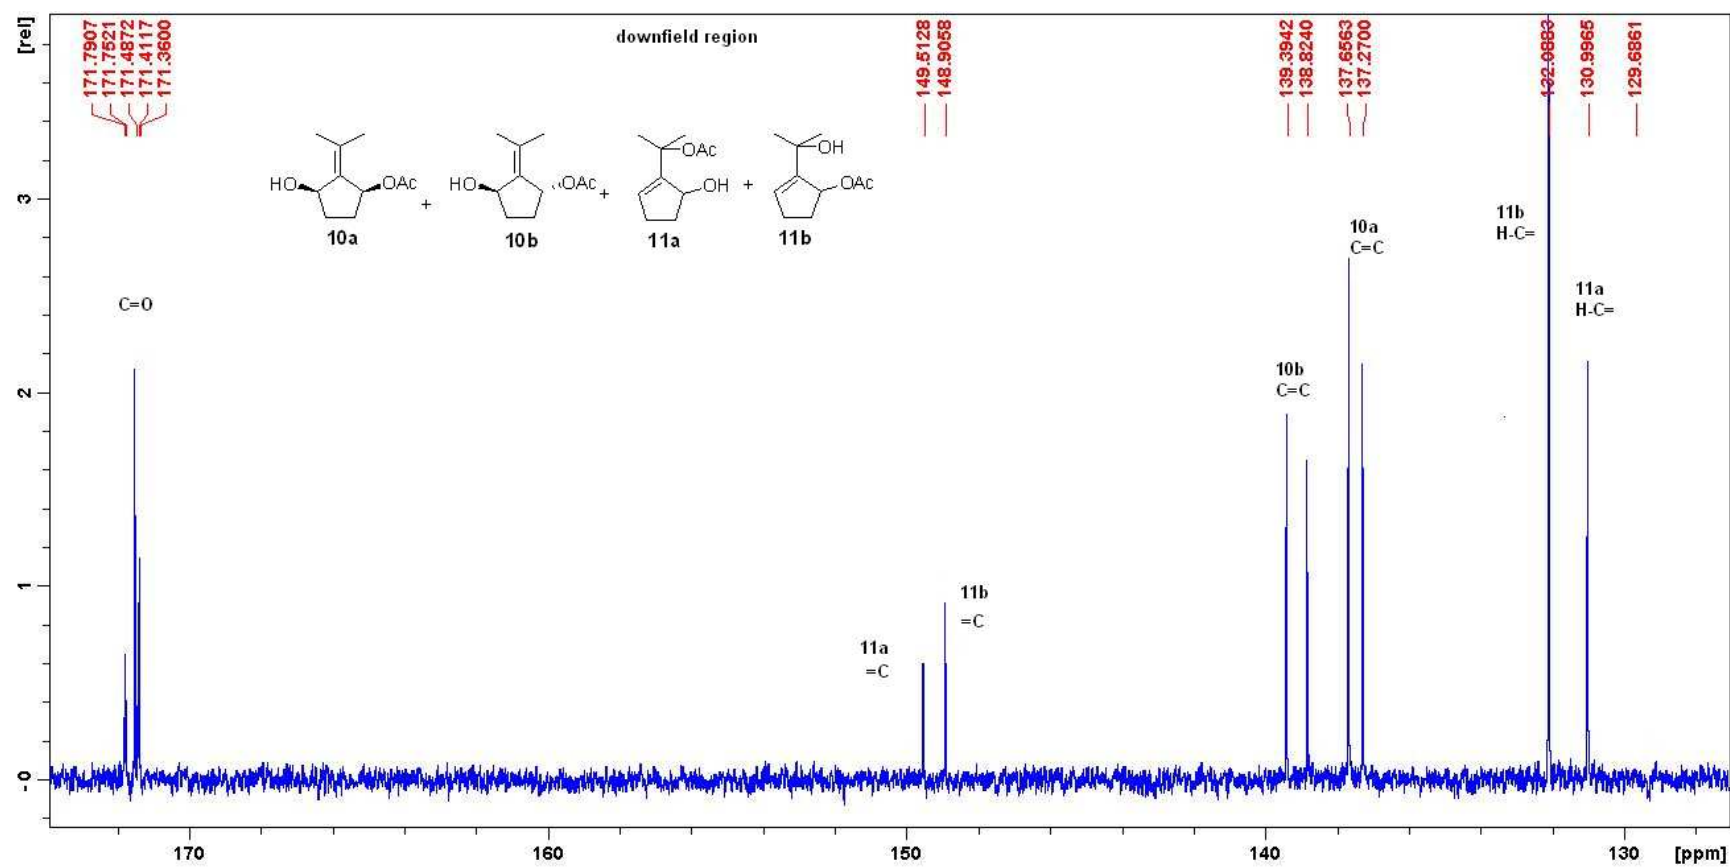

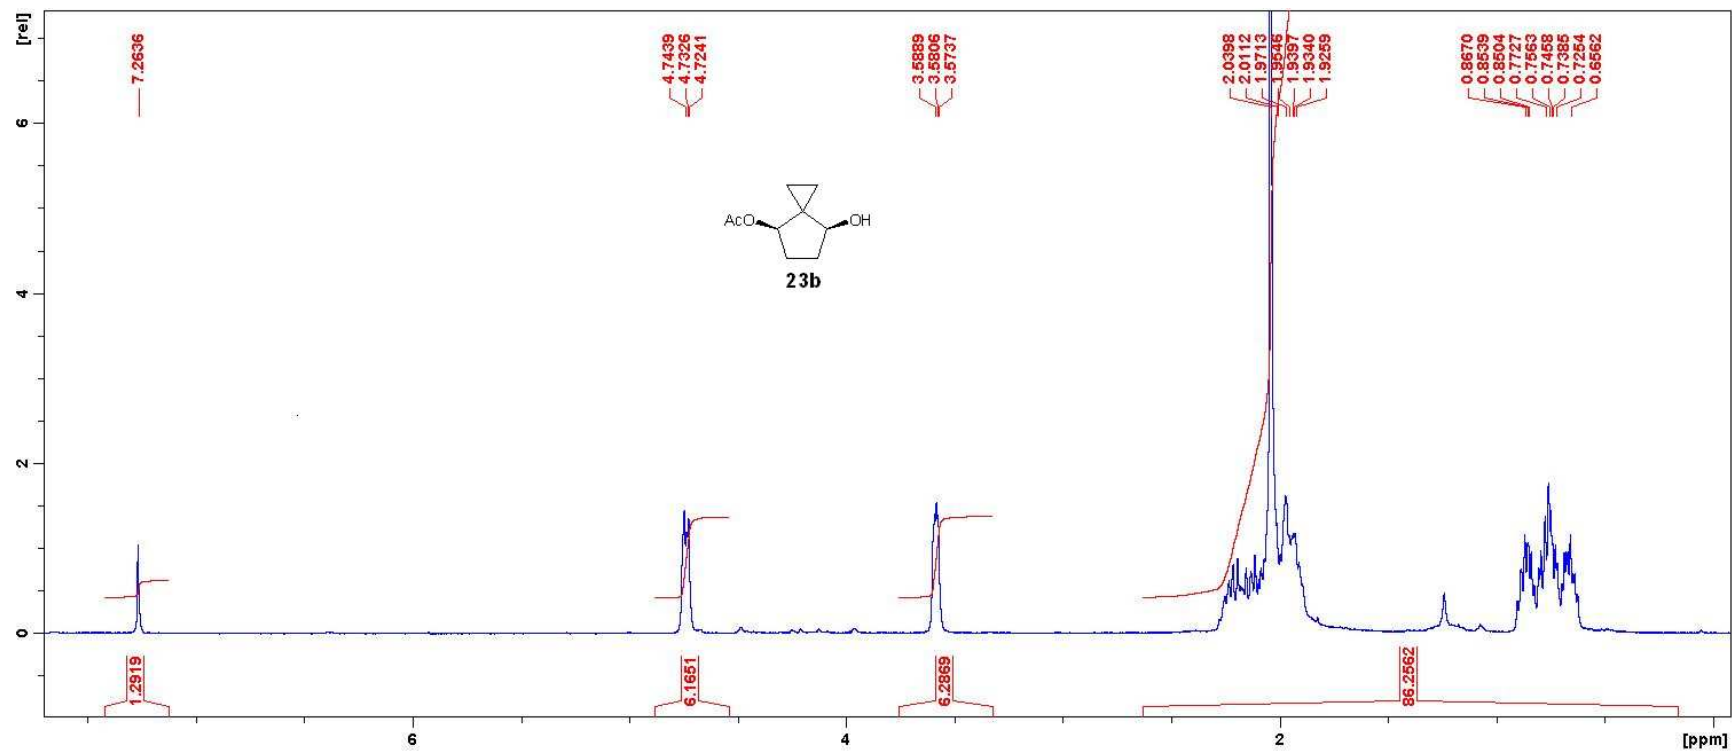

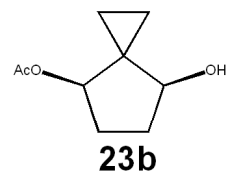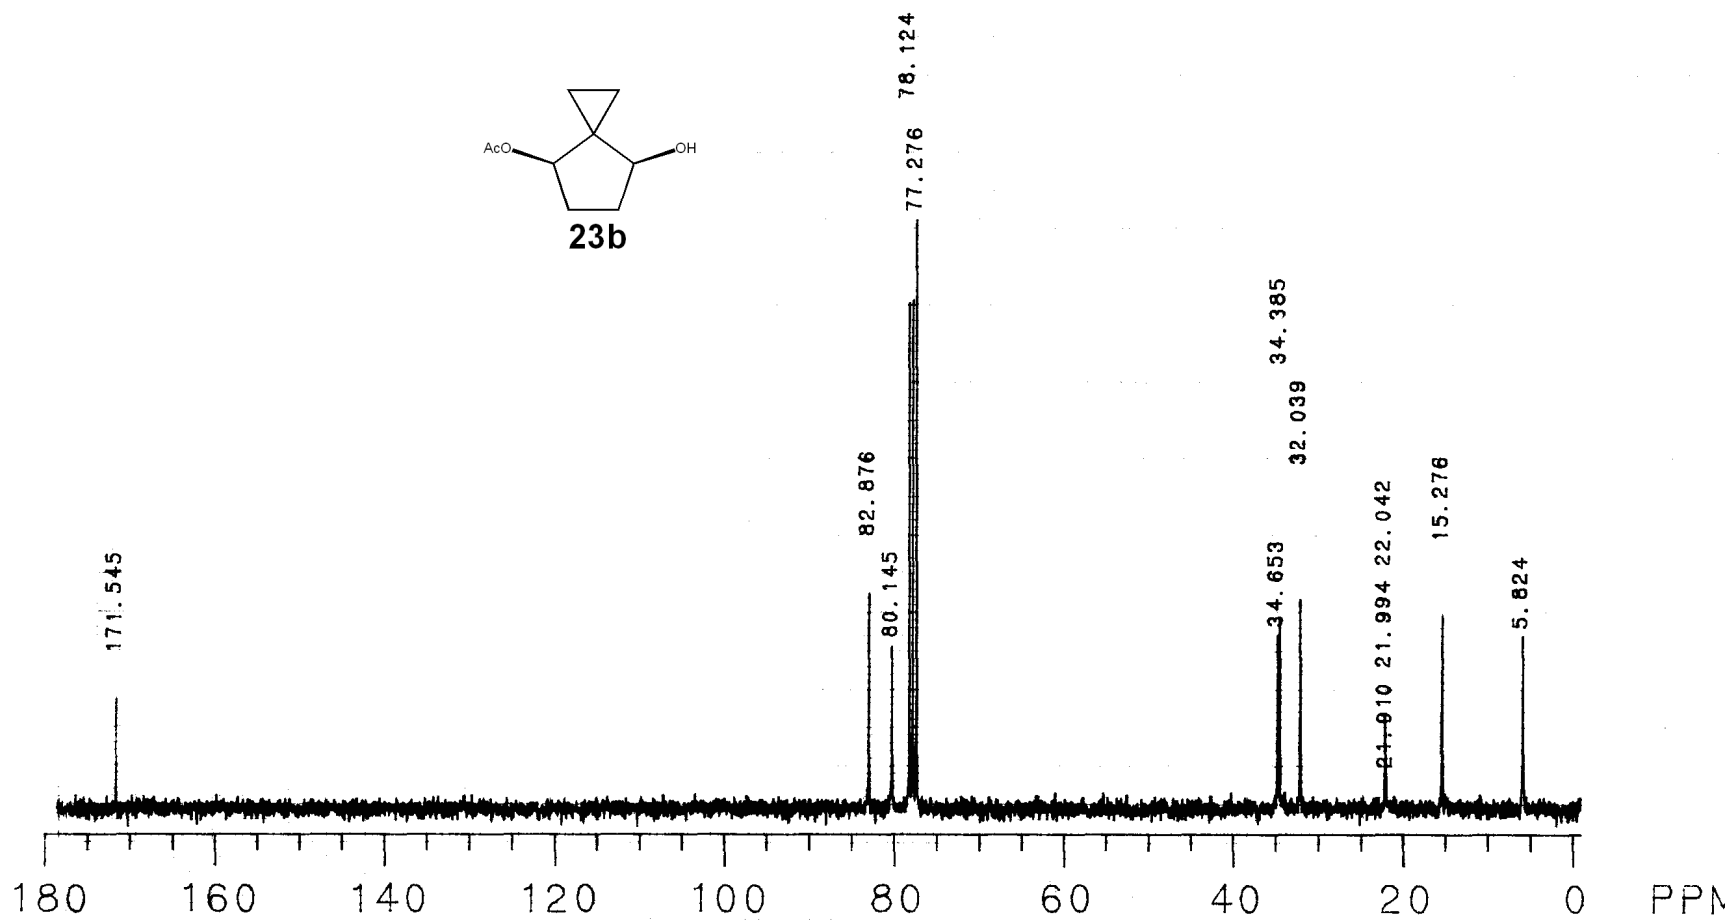

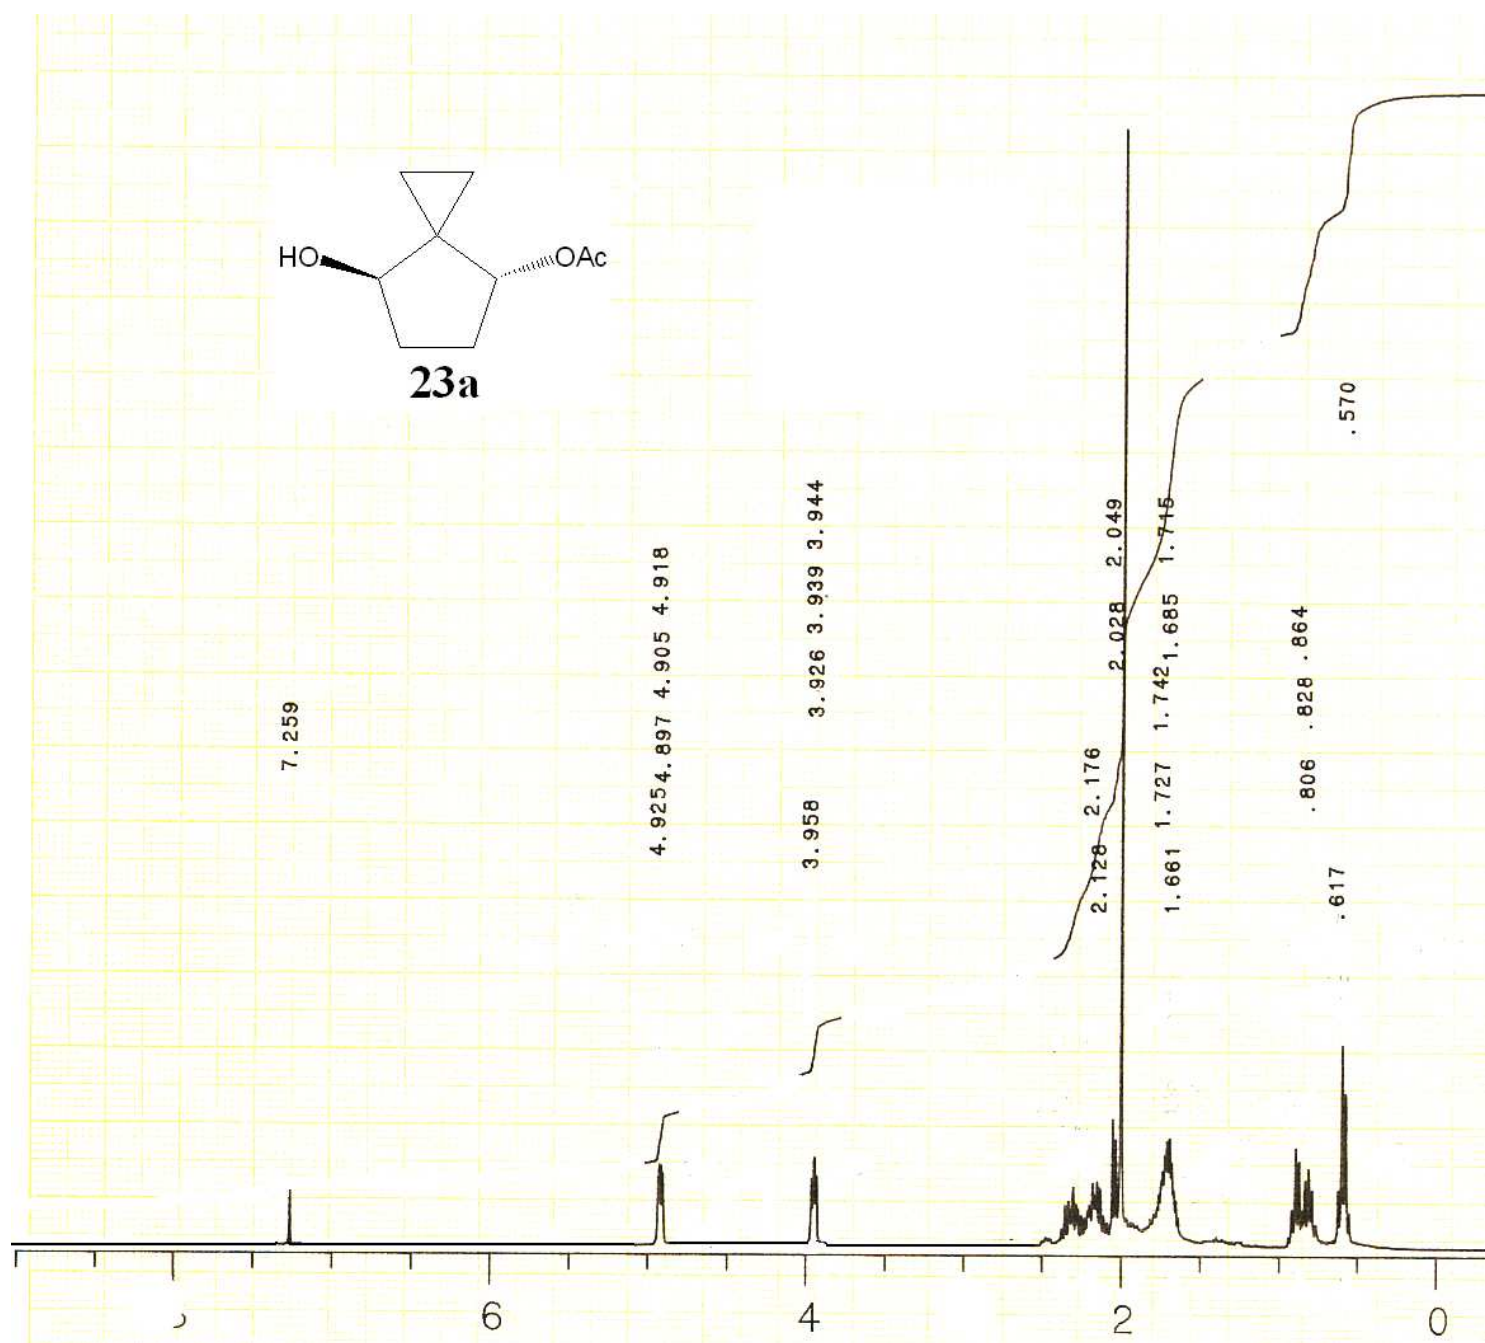

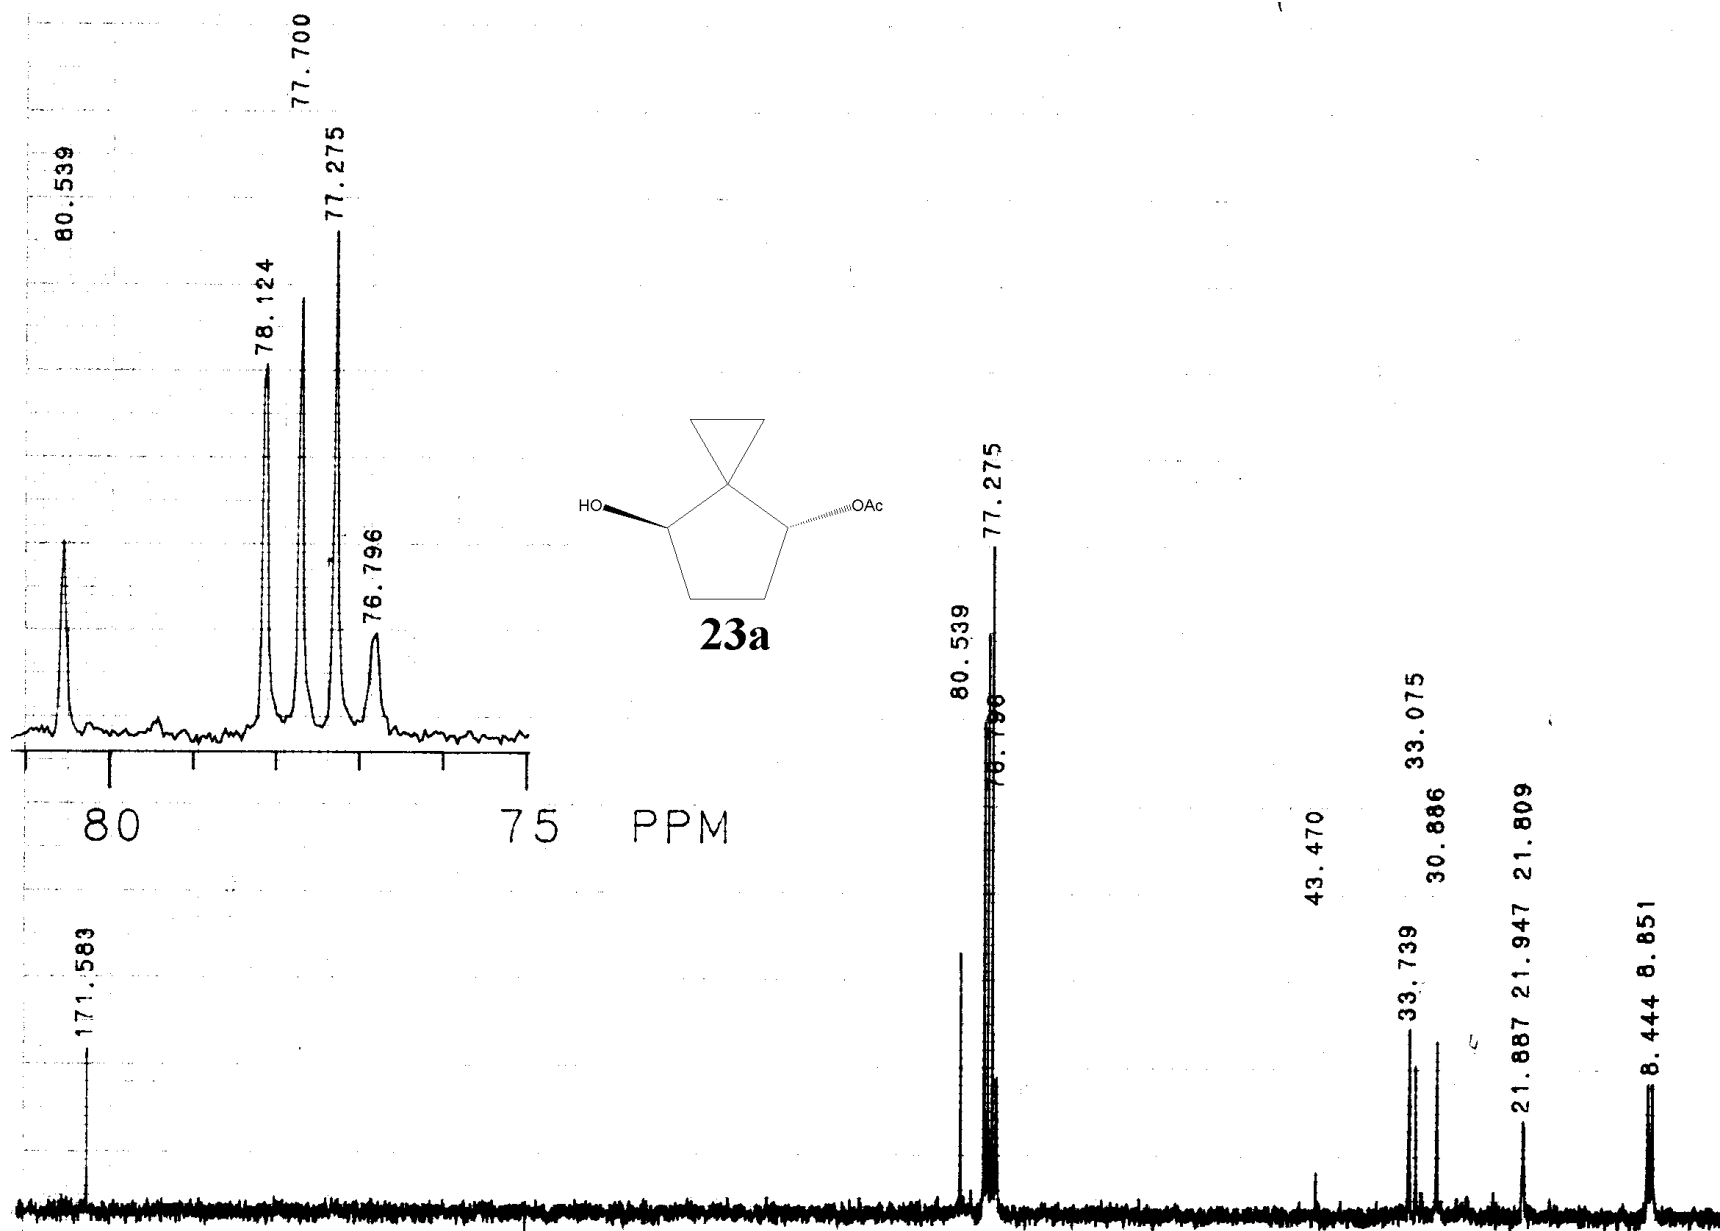

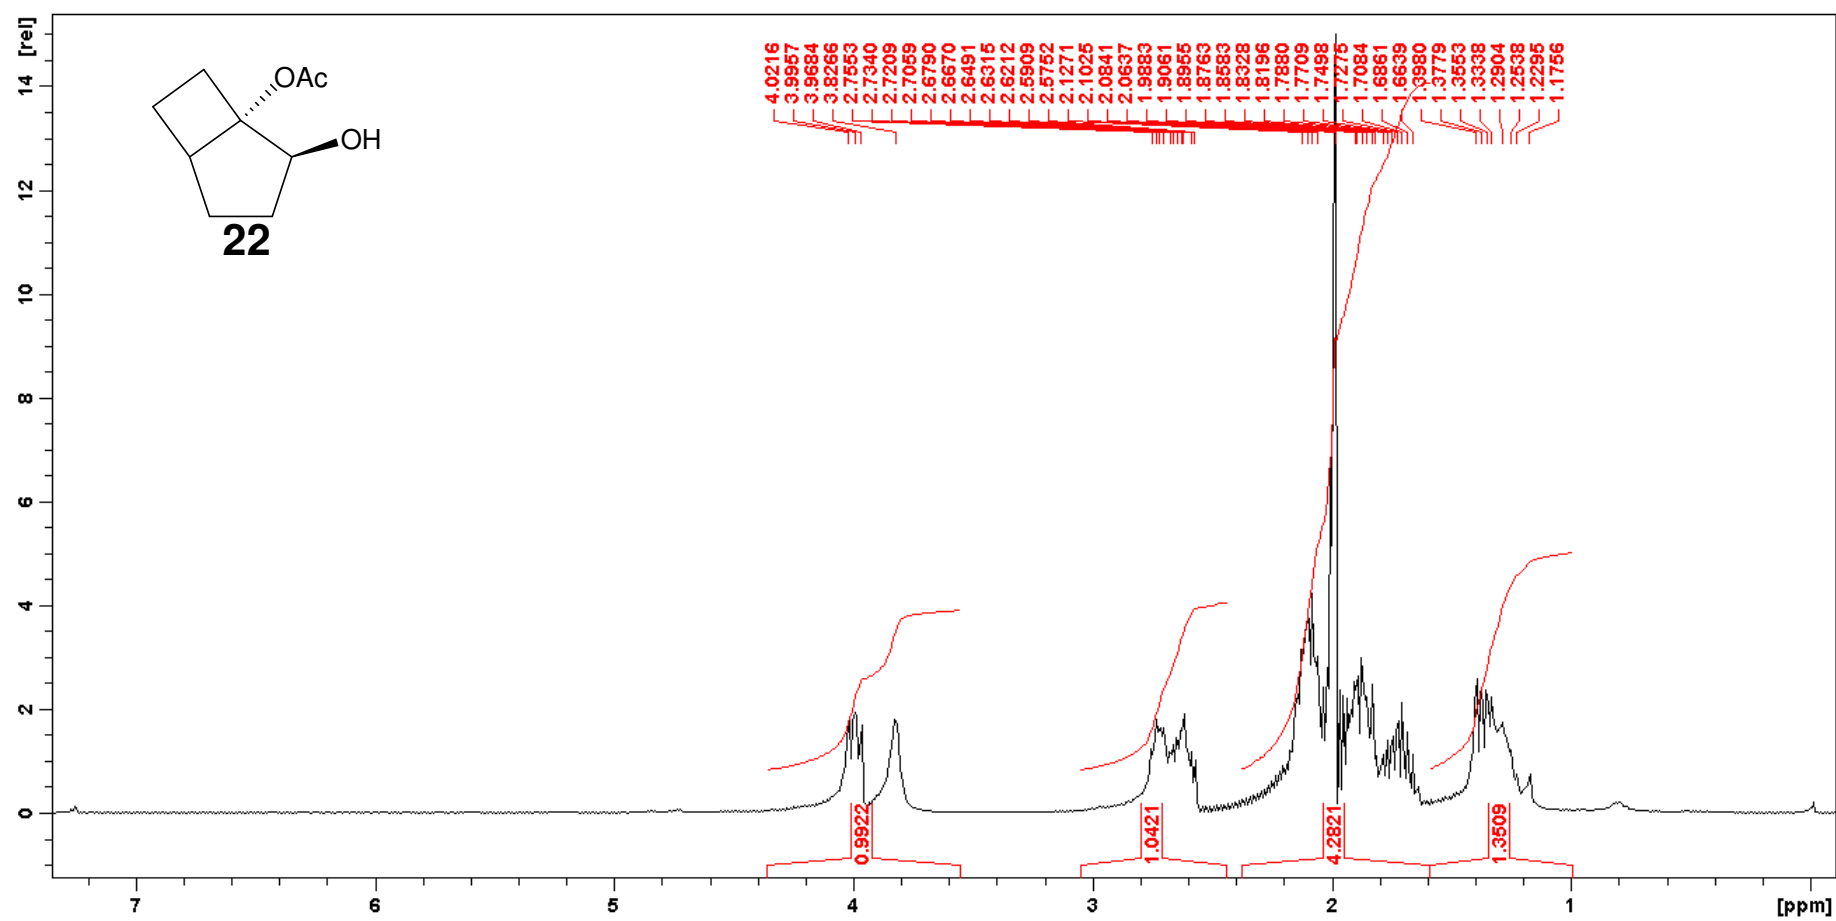

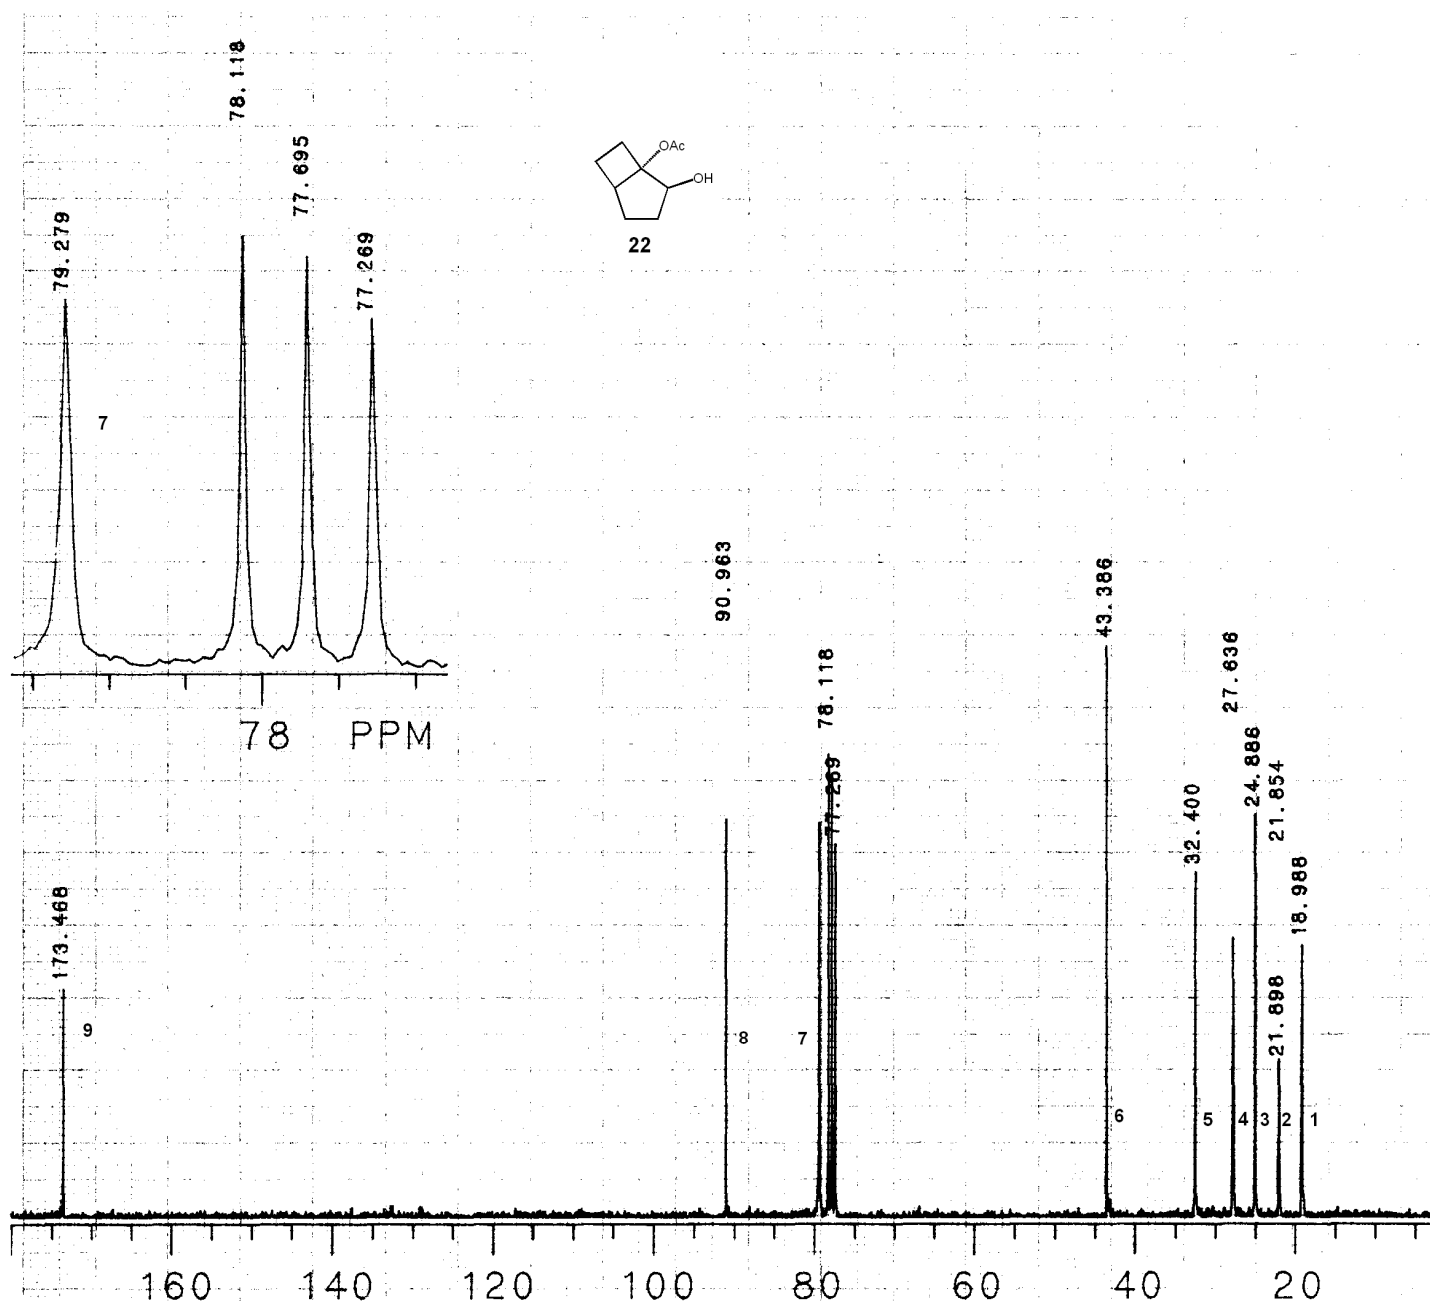



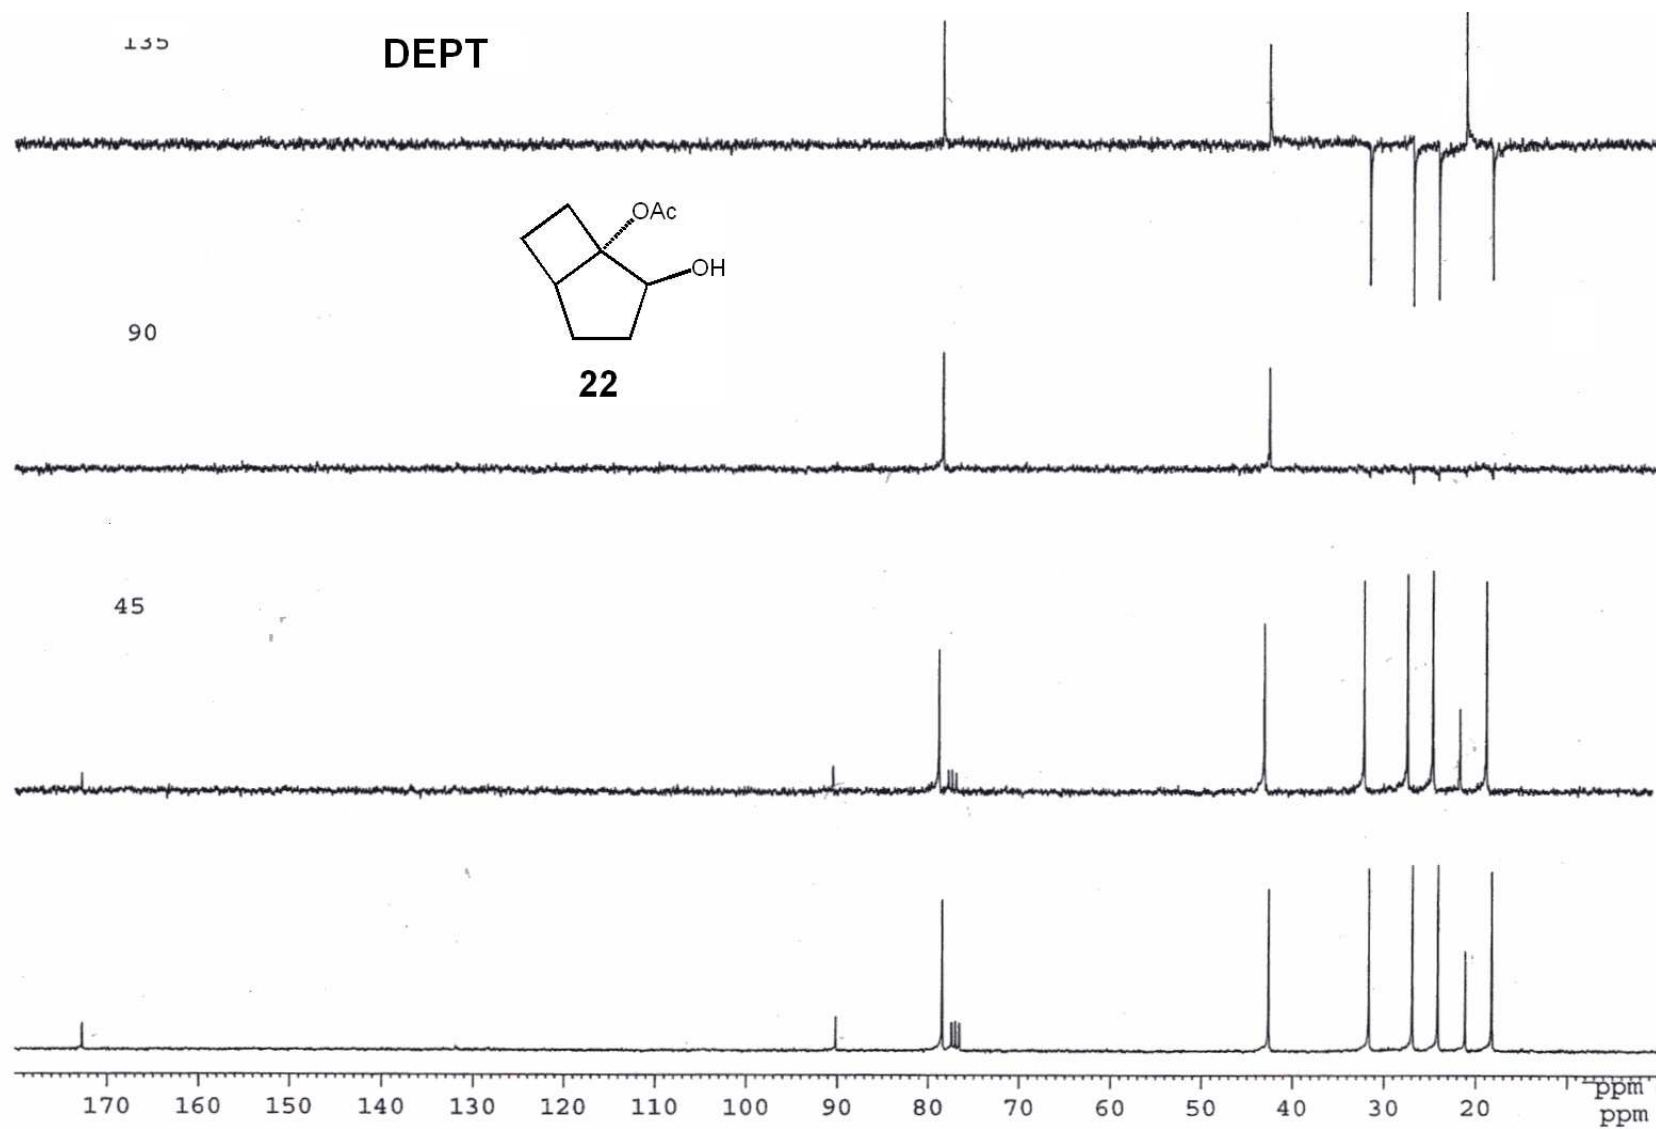

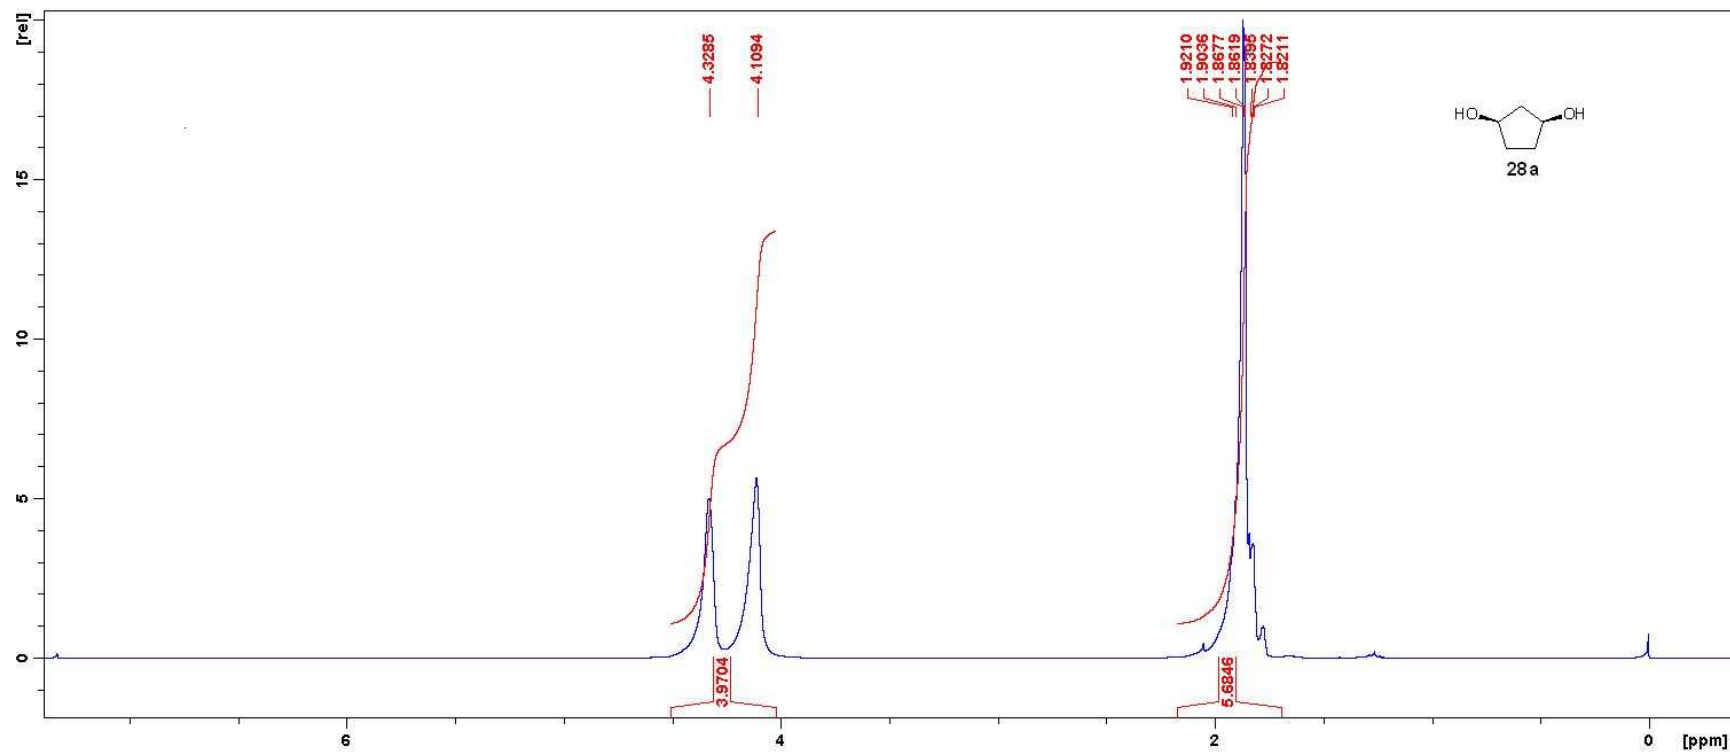

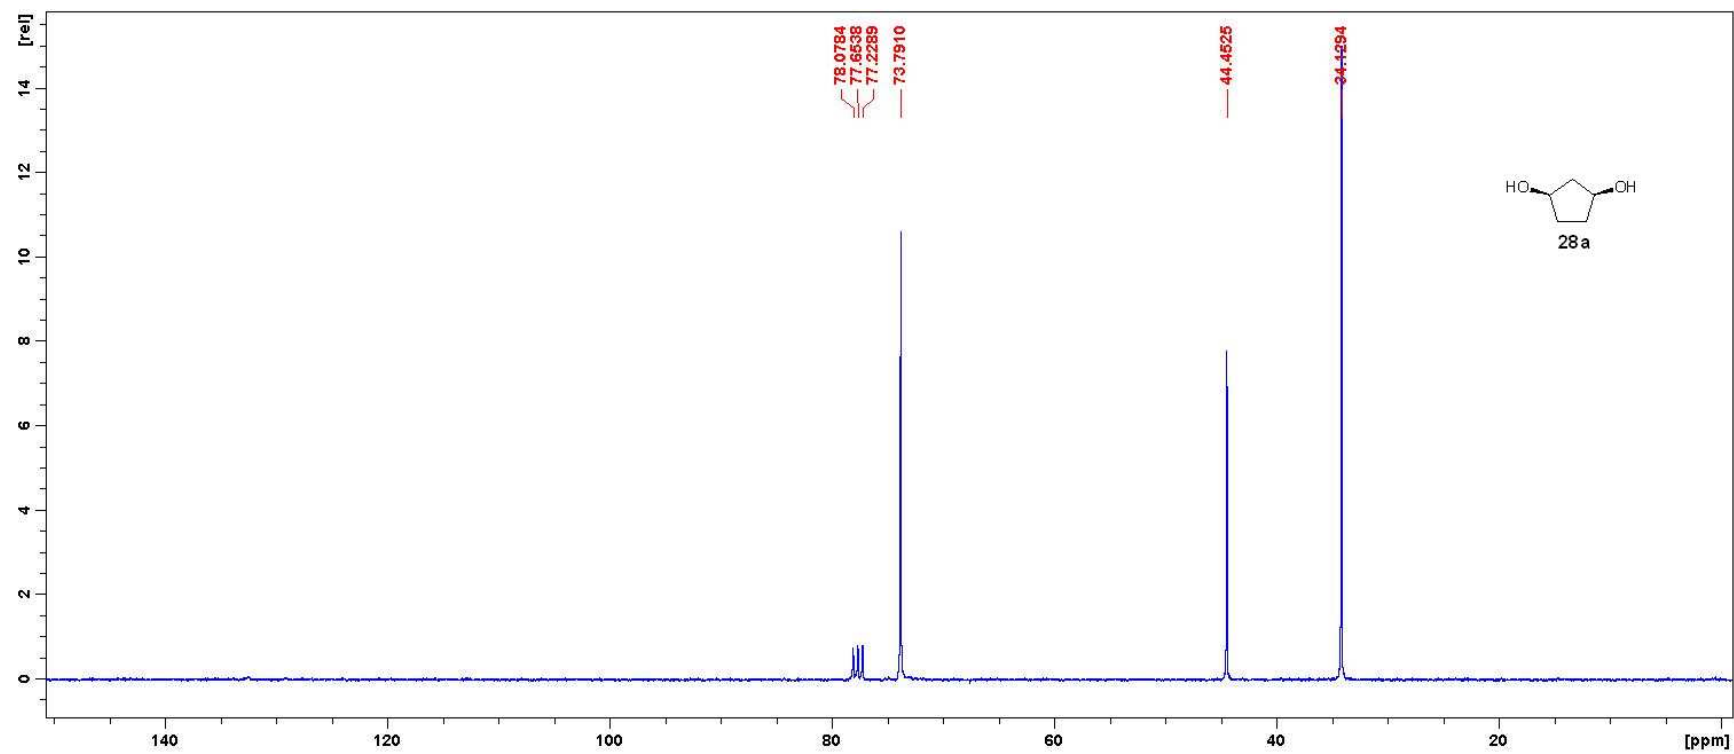

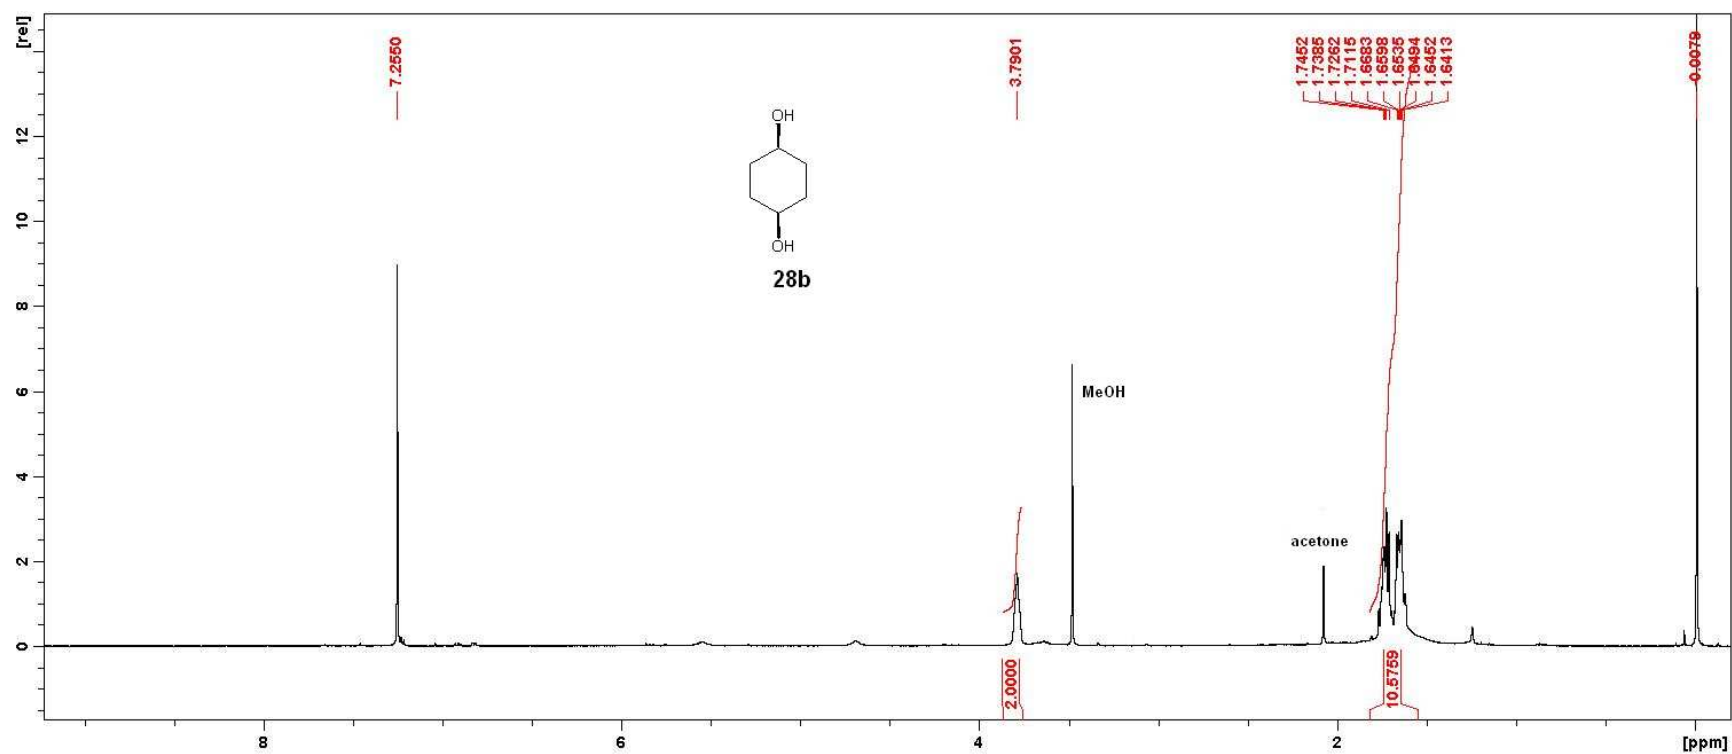

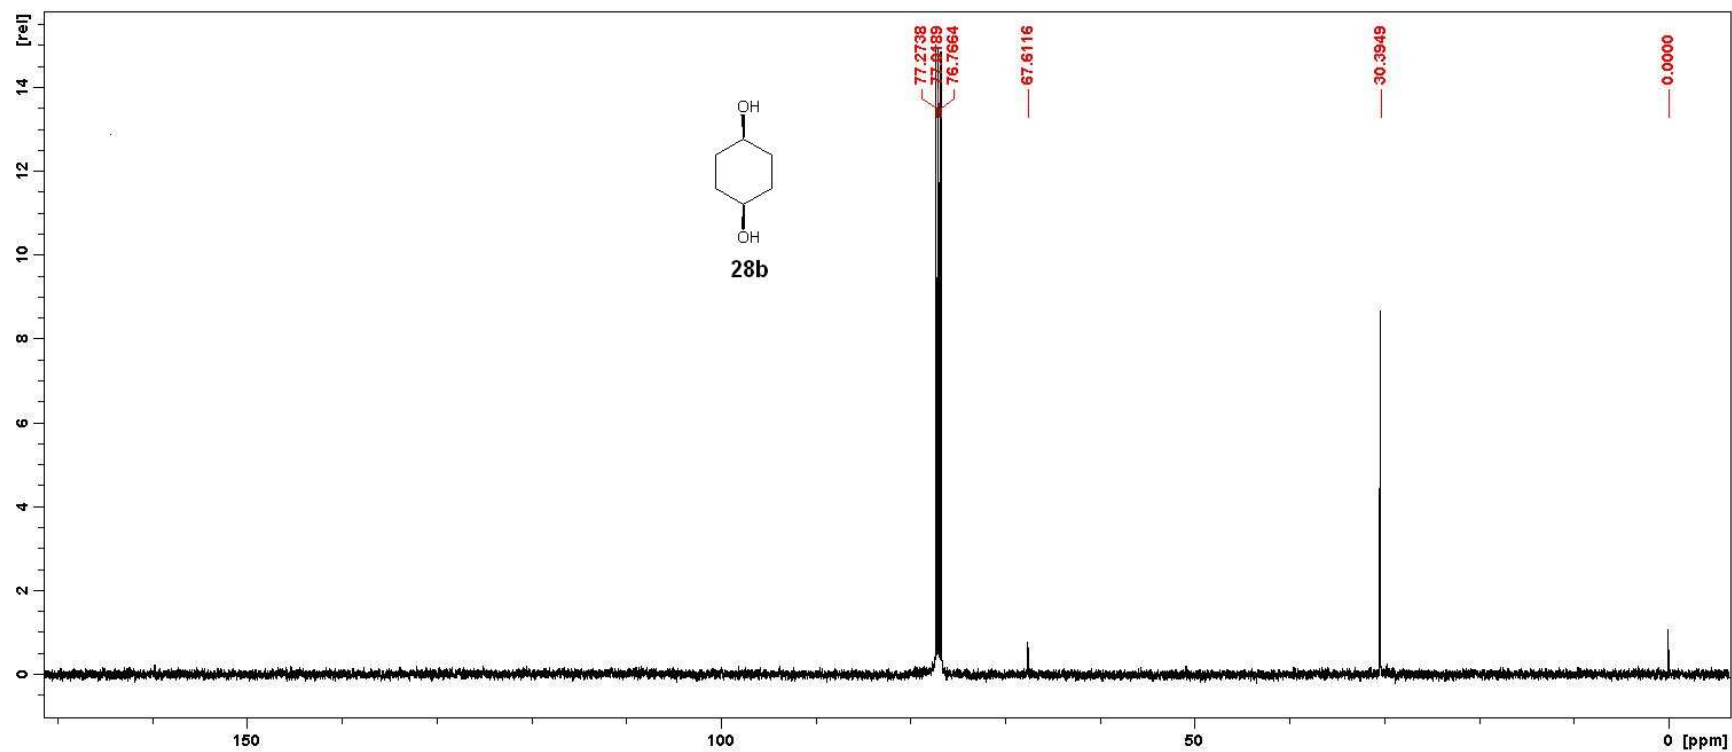

Supplement: Supplementary file 1 [file 4528618]
